# Supplementary material for: Transcriptome and metabolome profiling unveil the accumulation of chlorogenic acid in autooctoploid Gongju
Source: Front Plant Sci. 2024 Nov 1;15:1461357. doi: 10.3389/fpls.2024.1461357 (PMC11563975; doi:10.3389/fpls.2024.1461357)
Supplement: Supplementary file 14 [file Table6.xlsx]

## Sheet: Sheet1
Table s6 Identification of DAMs between tetraploid and octaploid at same flowering stages
4BS vs 8BS
	Index	Formula	Compounds	Fold_Change	Log2FC	Type
1	Zmwp007375	C15H18O2	Dehydrocostuslactone	0.593633	-0.752356	down
2	zjhp113013	C20H22O6	Eupachinilide D(iso-1)	2.09106	1.06423	up
3	Lmcp007655	C15H20O2	Atractylenolide Ⅱ	2.93166	1.55172	up
4	Zahp008024	C10H10O3	3,4-Methylenedioxypropiophenone	1.56829	0.649193	up
5	Wagp001741	C19H28N2O9	N-(gamma-L-glutamyl)tyramine O-glucoside	4.03292	2.01182	up
6	Qmyp122009	C15H22O3	3H-Naphth[1,8ab]oxirene-8-acetic acid(ISO1)	1.93831	0.954802	up
7	zjbp111621	C15H20O2	12,15-dioxo-α-selinen	2.00978	1.00704	up
8	Wahp006113	C24H26O12	Rhamnazine-4'-O-β-D-glucoside	1.52825	0.611879	up
9	Wbmn011269	C22H34O5	Vitexilactone	0.712323	-0.489397	down
10	pmp000172	C23H24O11	5,2'-Dihydroxy-7,8-dimethoxyflavone glycoside*	1.97665	0.983058	up
11	pmp000588	C25H24O14	Diosmetin-7-O-(6''-malonyl)glucoside	1.67874	0.747379	up
12	Lwhp010633	C10H9NO	Echinopsine	0.705291	-0.503708	down
13	Zmgp005070	C24H26O13	Centaurein	1.87015	0.903153	up
14	NK10253223	C8H9NO3	2-Amino-3-methoxybenzoic acid	1.41123	0.496948	up
15	Lmmp003767	C21H18O12	Kaempferol-7-O-glucuronide	1.99698	0.997821	up
16	pmp000661	C15H22O	Cryptomerione	1.47701	0.562684	up
17	MWSmce564	C15H22O	Germacrone	1.6761	0.745112	up
18	mws0789	C15H12O4	Pinocembrin (Dihydrochrysin)	1.46569	0.551575	up
19	pme3459	C20H28O3	Cafestol	2.21764	1.14902	up
20	MWSmce591	C15H22O2	Curcumenol	2.52929	1.33873	up
21	Zaxn005652	C20H28O3	Pisiferic acid	0.680493	-0.555348	down
22	Zaxn005783	C21H32O2	Methyl neoabietate	0.680493	-0.555348	down
23	MWSCX005	C15H20O2	selina-4,11-diene-12,15-dial	4.17768	2.0627	up
24	Wahp005790	C34H37N3O7	Di-p-coumaroylcaffeoyl Spermidine	1.60591	0.683389	up
25	zjgp122326	C12H15NO7	Pyridine-4-formyl-O-β-D-glucopyranoside	0.668267	-0.581504	down
26	Lazn005243	C12H18O4	3-(3,4-Dimethoxyphenyl)-1-propanol	1.72029	0.782654	up
27	pmp001236	C11H10O4	Clove chromone	1.82705	0.869519	up
28	pmf0440	C10H10O2	4-MethoxycinnaMaldehyde	1.90638	0.930834	up
29	Lmhn002895	C23H20O12	Feruloylcaffeoyltartaric acid	1.68946	0.756566	up
30	MW0052703	C11H14O2	Ethyl 3-phenylpropanoate	1.43215	0.518185	up
31	pmp000017	C12H12O2	Butylidenephthalide	0.594921	-0.749229	down
32	Zahp011639	C16H29NO	Dodecadienoic acid isobutylamide	0.669165	-0.579567	down
33	Wasn002508	C16H30O9	Glucosyl 7-methyl-3-methyleneoctane-1,2,6,7-tetraol	1.47785	0.563503	up
34	Lthp012010	C15H18O3	Zaluzanin C	0.660046	-0.599363	down
35	Lmjp003655	C22H22O11	6-C-MethylKaempferol-3-glucoside	1.58471	0.664221	up
36	MWS0687	C7H8N2O2	1-Methyl-6-Oxo-1,6-Dihydropyridine-3-Carboxamide	0.497191	-1.00813	down
37	pmp000243	C12H12O2	E-Butylphthalide	0.611624	-0.709283	down
38	MW0129513	C16H16O4	1-(2,6-Dihydroxy-4-methoxyphenyl)-3-phenyl-1-propanone	0.475187	-1.07343	down
39	pmp001198	C6H13NO2	6-Deoxyfagomine	1.77041	0.824083	up
40	mws1500	C11H12O2	Ethyl cinnamate	0.634475	-0.656364	down
41	Hmln001836	C29H32O17	Kaempferol-3-O-(6''-Acetyl)glucosyl-(1→3)-Galactoside	1.4436	0.529673	up
42	Lajp005898	C24H26O13	5,8,3'-trihydroxy-6,7,4'-trimethoxyflavone-8-O-β-D-glucoside	1.86057	0.895744	up
43	Lmyn006227	C15H10O5	Galangin (3,5,7-Trihydroxyflavone)	0.705508	-0.503265	down
44	Qatp005980	C15H22O2	Watsonol A	1.47825	0.56389	up
45	Wahp006114	C34H37N3O6	Tri-p-coumaroyl Spermidine	1.66539	0.735863	up
46	Lkmp122406	C21H32O10	Hydroxysonchuside F	1.64385	0.717082	up
47	Qmyp122111	C15H20O2	Eudesma-4(14),11(13)-dien-12,6β-olide(ISO3)	2.55651	1.35417	up
48	MW0127058	C11H20O2	6-Hexyltetrahydro-2H-pyran-2-one	1.94353	0.958679	up
49	HX1223	C15H24O	Germacra-1(10),4,7(11)-trien-9α-ol	1.78265	0.834021	up
50	MWS20173	C15H24O2	1-Hydroxybisabola-2,10-dien-4-one	2.28018	1.18915	up
51	pmp000003	C16H12O7	Nepetin (5,7,3',4'-Tetrahydroxy-6-methoxyflavone)	1.46492	0.550818	up
52	mws2105	C14H12O3	Benzyl salicylate	0.30044	-1.73485	down
53	Zahp012121	C15H24O	1β-hydroxy-4(15),5E,10(14)-germacratriene	1.80726	0.853806	up
54	HJAP058	C19H20O6	5,6,7,4'-Tetramethoxyflavanone	1.61972	0.695749	up
55	pmp000587	C24H22O14	Luteolin-7-O-(6''-malonyl)glucoside	1.46057	0.546536	up
56	pmb0502	C16H25N3O2	p-Coumaroylspermidine	2.13024	1.09102	up
57	Lmzn001664	C27H28O17	Kaempferol-3-O-glucuronide-7-O-glucoside	2.99051	1.58039	up
58	Zmap010726	C20H32O5	Balsamiferine E	1.75801	0.813942	up
59	Zbsp005869	C18H16O7	7,4'-Dihydroxy-3,5,3'-trimethoxyflavone	2.13134	1.09176	up
60	MW0139483	C27H30O16	Quercetin 3-(2-glucosylrhamnoside)	1.65627	0.727942	up
61	Lhfp110340	C15H24O	Eremofukinone	1.50523	0.589984	up
62	Lmsn003297	C21H22O11	3,4,2',4',6'-Pentahydroxychalcone-4'-O-glucoside	1.91665	0.938585	up
63	Qmyp122107	C15H20O2	3,5,11(13)-Trieneudesma-13-oic acid(ISO3)	1.53903	0.622023	up
64	Qmgp102423	C27H34N2O10	3α-Dihydrocadambine	2.98519	1.57782	up
65	pmb3023	C21H22O11	Eriodictyol-8-C-glucoside	2.21111	1.14477	up
66	pmb0626	C33H40O20	Apigenin-6-C-glucoside-7-O-Sophoroside	3.87154	1.95291	up
67	Llhp011701	C30H44O4	11,12-epoxy-13-hydroxy-3-Oxooleanane-28-oic acid gamma-lactone (Liquidambaric Lactone)	1.59603	0.674488	up
68	Lmjn007447	C15H22O2	Arteannuin J	0.691931	-0.5313	down
69	Lmmp102003	C15H22O	1(10)E,4E-Germacrone	0.591762	-0.756911	down
70	Lmyp004407	C30H26O13	Kaempferol-3-O-(2''-p-Coumaroyl)galactoside*	6.36746	2.67072	up
71	HJAP056	C23H24O11	Dihydroxy-dimethoxyflavone-7-O-glucoside*	1.89286	0.920565	up
72	mws1375	C12H21N3O6	Nicotianamine	0.304214	-1.71684	down
73	pmp000009	C18H16O8	Centaureidin (5,7,3'-Trihydroxy-3,6,4'-Trimethoxyflavone)	1.44316	0.529235	up
74	Hmcp004865	C15H20O2	Costunolide	2.94319	1.55738	up
75	Hmcn002875	C15H10O7	6-Hydroxyluteolin	0.661107	-0.597045	down
76	Lasp003235	C30H32O18	Genistein glucosyl malonyl glucoside	0.704602	-0.50512	down
77	Lmsp009245	C18H18O7	3',5-Dihydroxy-4',6,7-Trimethoxyflavanone	0.712756	-0.48852	down
78	Qayp009396	C20H28O3	Solidagenone	2.10845	1.07618	up
79	pma2088	C27H30O17	Quercetin-3,4'-O-di-glucoside	2.16767	1.11615	up
80	mws1474	C18H16O7	5,7-Dihydroxy-3',4',5'-trimethoxyflavone	1.56578	0.646877	up
81	Hmcp002316	C21H20O11	Isorhamnetin-3-O-arabinoside	2.53317	1.34095	up
82	Lmmp003903	C23H22O12	Kaempferol-3-O-(2''-O-acetyl)glucoside	1.8124	0.8579	up
83	MWSmce503	C15H22O3	Nardosinone	2.22971	1.15686	up
84	zjhp113024	C20H26O5	mollisorin A	1.90119	0.926904	up
85	MW0052877	C15H24O	2-trans,6-trans-Farnesal	1.77179	0.825209	up
86	Lmzn001582	C18H28O9	5'-Glucosyloxyjasmanic acid	1.46296	0.548891	up
87	MWSmce584	C8H11NO	L-Tyramine	2.27803	1.18779	up
88	MW0137619	C25H24O11	Catechin pentaacetate	0.641938	-0.639495	down
89	Zblp001009	C12H17NO6	3-pyridine-methanol-O-β-D-glucopyranosyl	1.46121	0.547164	up
90	Cmap003986	C35H40O8	Arteminolide C	2.14043	1.0979	up
91	Lmmp002080	C11H16N2O	N-(4-Aminobutyl)benzamide	1.41056	0.496264	up
92	Qmyp122006	C21H36O8	Alatoside A(ISO)	1.92555	0.945267	up
93	zjbp111620	C15H20O2	12,15-dioxo-selina-4,11-dine	3.04989	1.60876	up
94	Qmqp102534	C15H20O2	Isoalantolactone	2.65865	1.41069	up
95	Hmjn008136	C30H46O4	2,3-Dihydroxyoleana-11,13(18)-dien-28-oic acid (Camaldulenic acid)	2.19716	1.13564	up
96	zjzp121504	C15H22O2	eupatorenone	2.99175	1.58099	up
97	MW0113161	C14H18N2O5	Musk ketone	2.56213	1.35734	up
98	Lmmn003663	C14H18O9	5-Glucosyloxy-2-Hydroxybenzoic acid methyl ester	1.68576	0.753396	up
99	Zbzp007301	C18H28O3	2-Methoxy-6-undecyl-1,4-benzoquinone	0.664975	-0.588629	down
100	Hmqp003435	C29H30O17	Apigenin-7-O-(2''-O-apiosyl)(6''-Malonyl)glucoside	0.557786	-0.842215	down
101	MW0131473	C17H14O8	5,7,3',4'-Tetrahydroxy-6,8-dimethoxyflavone	1.65088	0.72324	up
102	mws1509	C13H10O3	Phenyl salicylate	2.83498	1.50334	up
103	mws1013	C9H6O4	Esculetin (6,7-Dihydroxycoumarin)	0.52151	-0.939234	down
104	pmp001110	C25H26O13	Apigenin-6-C-xyloside-8-C-arabinoside	1.77646	0.829005	up
105	Ladp002935	C10H7NO3	3-quinolinecarboxylic acid	0.528517	-0.919977	down
106	Lmdp002381	C11H14O5	Genipin	1.55312	0.635168	up
107	HX1367	C9H6O2	coumarin(ISO2)	1.90349	0.928648	up
108	Wbsp004755	C10H10O3	Methyl Hydroxycinnamate	1.51765	0.601835	up
109	mws0064	C15H12O6	Eriodictyol (5,7,3',4'-Tetrahydroxyflavanone)	1.43308	0.519119	up
110	Lmln010063	C14H22O	2,6-Di-tert-butylphenol	0.619634	-0.690512	down
111	Hmdn006855	C30H48O3	3,4-Cycloopen-cycloaltin-4(29),25-diene-24(R)-hydroxy-3-carboxylic acid	1.44187	0.527942	up
112	Ymjm000152	C12H16O7	p-Hydroxypheny-β-D-allopyranoside	1.4857	0.571142	up
113	Zmhp002714	C16H12O6	5,6,7-Tetrahydroxy-8-methoxyflavone*	1.68641	0.753957	up
114	Qatp009254	C15H22O	Cyclocolorenone	1.48855	0.573909	up
115	Lmzp004885	C17H14O7	Tricin (5,7,4'-Trihydroxy-3',5'-dimethoxyflavone)	2.34254	1.22807	up
116	Jmgn005927	C15H12O6	2-hydroxynaringenin	1.40495	0.490516	up
117	MW0119160	C9H8O3	3',4'-(Methylenedioxy)acetophenone	1.58057	0.660449	up
118	Zmtn001624	C10H7NO3	N-Acetylisatin	0.379729	-1.39696	down
119	mws1172	C22H22O10	Trifolirhizin (Maackiain-3-O-glucoside)	0.685698	-0.544356	down
120	Lmjp004404	C16H12O8	Quercetagetin-3-Methyl Ether	2.6694	1.41651	up
121	MWSmce502	C15H22O2	Artemisinic acid	2.6862	1.42556	up
122	Jmcp010061	C15H22O2	costic acid	2.6862	1.42556	up
123	Wbmp011024	C15H24O	Caryophyllenol II	2.02508	1.01798	up
124	zjbp111643	C15H22O	neopetasane(iso-1)	1.81285	0.858258	up
125	Qmyp101123	C15H22O2	Procurcumenol	1.40644	0.492049	up
126	pmp000912	C15H18O3	Hydroxyindesteolide	0.597853	-0.742137	down
127	Lmsp004137	C15H12O6	3,4,2',4',6'-Pentahydroxychalcone	1.73447	0.794494	up
128	MW0016414	C12H18O2	Carvyl acetate	1.47914	0.564756	up
129	pmp000479	C16H29NO	N-Isobutyl-2E,4E-dodedienamide	0.667963	-0.582161	down
130	pme1738	C7H9N2O	3-Carbamyl-1-methylpyridinium;(1-Methylnicotinamide)	2.61688	1.38785	up
131	Lmsp004301	C21H22O11	3',5,5',7-Tetrahydroxyflavanone-7-O-glucoside	1.59482	0.673391	up
132	zjgp122004	C21H22O11	Okanin-3'-O-β-D-glucoside*	1.67923	0.747803	up
133	mws0051	C16H12O5	Acacetin	0.667569	-0.583011	down
134	HX1225	C15H24O	2-methyl-2-vinyl-3-isopropenyl-5-isopropylidene cyclohexanol(ISO1)	1.47224	0.558012	up
135	Lsmp010415	C20H32O2	ent-pimara8(14),15-dien-3a,19-diol	1.66995	0.739802	up
136	MWSHC20168	C7H6O4	Methyl cumalate	1.40825	0.493903	up
137	Hmtn001288	C9H10O4	Methyl 2,4-dihydroxyphenylacetate	5.47053	2.45168	up
138	Wbmp003697	C13H20O2	(R)-3-(3'-Hydroxybutyl)-2,4,4-trimethylcyclohexa-2,5-dienone	1.60697	0.68434	up
139	Lmsn002247	C13H16O8	1-O-Salicyloyl-β-D-glucose	1.43214	0.518169	up
140	Zjyp110102	C15H22O	Nootkatone(iso-1)	2.21413	1.14674	up
141	Cmap003293	C15H16O3	Yomogin	0.499857	-1.00041	down
142	Wcgn012055	C20H30O4	Araucarolone	1.7393	0.798505	up
143	Jmbp005771	C19H18O8	Gardenin D	1.47921	0.56483	up
144	Zmsp002553	C21H32O10	Ixerisoside I	1.70157	0.766868	up
145	Lmcp006876	C17H14O2	8-(Benzyloxy)-1-Naphthol	2.66661	1.41501	up
146	mws0749	C7H6O3	4-Hydroxybenzoic acid	1.54019	0.623112	up
147	pmp000789	C19H18O8	Casticin (5,3'-Dihydroxy-3,6,7,4'-Tetramethoxyflavone)	1.42615	0.512122	up
148	Lcyp000676	C16H18O9	Magnolioside	1.90599	0.930544	up
149	Lmlp005236	C21H22O11	Dihydrokaempferol-3-O-glucoside	1.61626	0.692662	up
150	zjzp121502	C15H20O3	eupatorinol(iso-1)	3.42259	1.77509	up
151	Hmcn007243	C15H20O4	Artemisiifolin	2.52415	1.3358	up
152	Qatp009393	C15H22O2	Dihydrocostunolide	2.10564	1.07426	up
153	mws0459	C10H12O2	Eugenol	2.33967	1.2263	up
154	Jmln005880	C17H14O8	Viscidulin III	1.58889	0.668023	up
155	Cmdn004285	C25H38O17	6'-O-β-D-glucosylbarlerin*	1.75078	0.807995	up
156	mws0009	C10H10O3	Coniferaldehyde	1.55498	0.636899	up
157	Lmtn002565	C14H18O9	1-O-Vanilloyl-D-Glucose	1.70334	0.768362	up
158	pmp001073	C9H13NO2	Synephrine; 4-[1-Hydroxy-2-(methylamino)ethyl]phenol	1.80464	0.851713	up
159	Lmdn006025	C15H12O6	2-Hydroxy-2,3-dihydrogenistein	1.42591	0.511878	up
160	pme3200	C2H7N3	1-Methylguanidine	1.42897	0.514975	up
161	Lmtp002474	C26H28O14	Apigenin-6-C-(2''-glucosyl)arabinoside	2.00792	1.0057	up
162	mws1478	C10H14N2	Nicotine	0.612345	-0.707583	down
163	Qmyp101336	C18H28O3	JiangxiBaiyingsu I(ISO2)	0.649977	-0.621539	down
164	Lwmp121426	C15H22O3	Aerugidiol(iso-01)	1.61518	0.691693	up
165	Lmyn012274	C30H46O4	3,25-Epoxy-3-hydroxyolean-18-en-28-oic acid (Semimoronic acid)	2.97805	1.57437	up
166	Lmyn011818	C30H44O4	3,19-Epoxy-3,22-dihydroxydammara-20,24-dien-26-oic acid δ-lactone (Semialactone)	3.5211	1.81603	up
167	Jmcn007391	C15H22O4	1β,3β-dihydroxy-eudesmane-5,11(13)-dien-12-oic acid	3.57825	1.83926	up
168	Hmgn001653	C7H6O3	Protocatechualdehyde	1.51627	0.600527	up
169	Lmyn003835	C14H10O7	4-(3,4,5-Trihydroxybenzoxy)benzoic acid	2.3372	1.22478	up
170	Jmcn007456	C15H22O4	2α,3β-dihydroxy pterodontic acid	3.13835	1.65001	up
171	Lmjp005558	C19H18O8	Quercetagetin-3,7,3',4'-Tetramethyl Ether	1.50347	0.588296	up
172	Wagp009074	C18H16O7	Santin	2.07136	1.05058	up
173	mws1574	C16H22O10	Geniposidic acid	1.99916	0.999397	up
174	Zmdn006929	C15H12O4	Aloe-Emodin-9-Anthrone	1.466	0.551882	up
175	mws0908	C16H12O5	Glycitein	0.231843	-2.10878	down
176	HJN055	C21H24O10	Dihydrocharcone-4'-O-glucoside	2.05828	1.04144	up
177	MWSmce675	C12H16O7	Arbutin	1.44741	0.533472	up
178	zjzp121616	C15H20O4	5-Hydroxy-2-Carbonylcadinane-12,7-lactone (iso-2)	1.95742	0.968952	up
179	Lahp008617	C17H17NO	N-2-Phenylethyl-cinnamamide	2.1507	1.10481	up
180	MW0124084	C13H14O3	Eupatoriochromene	0.570648	-0.809327	down
181	mws4053	C30H48O3	3-Hydroxyurs-12-en-28-oic acid (Ursolic acid)	2.90112	1.53661	up
182	pmp000086	C13H16O6	1-Feruloyl-sn-glycerol*	7.74089	2.9525	up
183	Zmsn003589	C21H32O9	Lactuside B	1.14591e-05	-16.4132	down
184	pme2268	C7H7NO2	Trigonelline	2.59727	1.377	up
185	mws4173	C11H10O4	5,7-Dimethoxycoumarin (Limettin)(Citropten)	1.40629	0.491897	up
186	pmn001702	C21H18O12	Tetahydroxyflavone-7-O-glucuronide	1.72283	0.784783	up
187	pmb3142	C13H16O8	Salicylic acid-2-O-glucoside	1.49125	0.576519	up
188	Qmjp081206	C15H20O2	Isogermafurenolide	0.665713	-0.587027	down
189	Wmzp005304	C25H32ClN5O7	Astin H	1.59227	0.671082	up
190	MWSslk084	C10H14O2	4-Butylresorcinol	1.98005	0.98554	up
191	Wmhp000055	C8H8O4	2,5-Dimethoxybenzoquinone*	1.44337	0.529438	up
192	Lmzn006582	C30H46O4	2-Formyl-3-hydroxy-A(1)-norlup-20(29)-en-28-oic acid (Colubrinic acid)	1.78242	0.833836	up
193	Qatp009522	C15H20O2	Dehydrosaussurea lactone	0.441203	-1.18048	down
194	MW0016358	C11H22O2	Methyl decanoate	1.68378	0.751701	up
195	mws1024	C9H8O2	p-Coumaraldehyde	1.51034	0.594869	up
196	MW0168269	C17H22O3	Podocarpa-8,11,13-trien-16-oic acid, 12-hydroxy-	1.72452	0.786197	up
197	Lhhp005648	C10H10O3	Trans-3,4-methylenedioxycinnamyl alcohol	1.53068	0.614177	up
198	Lmbn001981	C7H6O3	2,5-Dihydroxybenzaldehyde	1.51547	0.599769	up
199	mws0179	C17H20O9	Chlorogenic acid methyl ester	4.08459	2.03019	up
200	mws0918	C16H12O5	Prunetin (5,4'-Dihydroxy-7-methoxyisoflavone)	0.700565	-0.513409	down
201	zjzp121601	C20H34O	Kolavenol	0.669131	-0.579638	down
202	Lmyn000160	C8H14O8	Mucic acid Dimethyl Ester	2.28683	1.19335	up
203	pmp000579	C22H22O11	Diosmetin-7-O-galactoside	1.59903	0.6772	up
204	HX1313	C20H28O3	3-Methylbutyryloxyeuryopsin	1.86954	0.902687	up
205	Zmjp003463	C26H28O14	Vitexin-2''-O-xyloside	2.07803	1.05522	up
206	pmb3014	C31H30O15	Luteolin-7-O-(6''-eudesmyl)glucoside	0.693912	-0.527175	down
207	MWSHY0029	C15H10O7	Quercetin	0.556078	-0.84664	down
208	Jmcn005419	C21H36O7	pterodontoside G	1.45537	0.541387	up
209	Zahp007129	C10H8O3	5-Hydroxy-2,3-dihydronaphthalene-1,4-dione	1.49936	0.584346	up
210	MW0054026	C17H24O5	1-O-Acetylbritannilactone	2.19228	1.13243	up
211	MW0169925	C10H14O	Thymol	1.44455	0.530623	up
212	pmp000249	C12H14O3	Senkyunolide F	3.17635	1.66737	up
213	Qmjp080401	C14H16O	(-)-Dihydropy rocurzerenone	1.55164	0.633798	up
214	Wcsn009756	C20H30O4	Epoxyeleganolactone	1.49579	0.580907	up
215	pmn001700	C30H48O3	24,30-Dihydroxy-12(13)-ene-lupeol	1.92073	0.941651	up
216	Cmxp003975	C21H22O11	Okanin-4'-O-glucoside(Marein)*	1.67813	0.746858	up
217	mws1292	C26H28O14	Isoschaftoside	2.17808	1.12305	up
218	mws0028	C8H8O4	Vanillic acid	1.46928	0.555113	up
219	Lmbp002962	C10H8O5	Isofraxetin	2.37145	1.24577	up
220	Zajp002650	C27H30O15	Vitexin-7-O-glucoside	1.94343	0.958602	up
221	pmp000436	C30H50O	13-Methyl-27-norolean-14-en-3-ol (Taraxerol)	6.11933	2.61337	up
222	MWSHY0096	C19H18O8	Chrysosplenetin (5,4'-Dihydroxy-3,6,7,3'-tetramethoxyflavone)	1.48108	0.566654	up
223	Lajp006279	C25H28O13	5,3'-dihydroxy-6,7,4',5'-tetramethoxyflavone glucoside	1.98097	0.986208	up
224	pmb0608	C25H24O14	Chrysoeriol-7-O-(6''-malonyl)glucoside	1.63495	0.709245	up
225	mws1179	C21H22O10	Naringenin-7-O-glucoside (Prunin)*	1.84473	0.883406	up
226	Zmsp001834	C8H8O4	2,6-Dimethoxy-1,4-benzoquinone*	1.41281	0.498567	up
227	Hmgp002189	C22H22O11	Hispidulin-7-O-glucoside(Homoplantaginin)	1.52512	0.608924	up
228	Smpn011792	C30H48O4	2,3-Dihydroxy-12-ursen-28-oic acid	1.65693	0.728513	up
229	Zmhn001905	C21H20O11	HydroxyAloe-emodin-8-O-glucoside	1.74735	0.80517	up
230	Lmzp002365	C22H24O11	Hesperetin-7-O-glucoside	1.47282	0.558581	up
231	HJN087	C21H22O10	Naringenin-4'-O-glucoside*	1.47517	0.560883	up
232	pmb0645	C28H34O16	Hesperetin-6-C-glucoside-7-O-glucoside	1.81992	0.863875	up
233	Hmln000659	C13H16O10	3-O-Galloyl-D-glucose*	2.23143	1.15797	up
234	MWSHY0104	C21H20O11	Luteolin-7-O-glucoside (Cynaroside)	1.58162	0.661407	up
235	Smgp006258	C30H26O13	6,7,3',4'-Tetrahydroxyaurone-6-O-(6''-O-p-Coumaroyl)glucoside	4.89412	2.29105	up
236	zjgp122013	C21H20O11	(Z)-6-O-β-D-glucopranosyl-6,7,3',4'-tetrahydroxyaurone	1.51206	0.596518	up
237	Hmlp005624	C16H12O5	3',7-dihydroxy-4'-methoxyflavone	0.526582	-0.925269	down
238	Lkmp122404	C21H30O9	Sonchuside E	1.42792	0.513911	up
239	pmb0628	C27H32O16	Eriodictyol-8-C-glucoside-4'-O-glucoside	1.8195	0.863546	up
240	Latp006450	C15H18O2	Spirovirgafuran	2.35607	1.23638	up
241	Yynp000008	C15H24O2	10α-hydroxycadin-4-en-15-al	1.54387	0.626554	up
242	pmp000250	C12H14O3	Z-6,7-Epoxyligustilide	1.46098	0.546935	up
243	pmb3074	C16H18O8	5-O-p-Coumaroylquinic acid*	2.89873	1.53542	up
244	Lmtn002796	C21H22O11	Aromadendrin-7-O-glucoside	1.91221	0.935241	up
245	HJN110	C30H48O3	3-Hydroxylup-20(29)-en-28-oic acid (Betulinic acid)	2.93088	1.55134	up
246	pmb3068	C16H18O8	1-O-p-Coumaroylquinic acid	1.93406	0.951631	up
247	Lamp003722	C30H32O18	Apigenin glucosyl malonyl glucoside	0.541764	-0.884263	down
248	Hmxp007521	C17H14O6	3',4'-Dihydroxy-7,5'-dimethoxyflavone	1.41619	0.502019	up
249	Lmyp004318	C30H26O13	Kaempferol-3-O-(6''-p-Coumaroyl)galactoside*	4.58953	2.19835	up
250	Zmhp003784	C27H30O17	Rhodioflavonoside	1.8265	0.869084	up
251	mws0044	C15H12O7	Taxifolin(Dihydroquercetin)	150839	17.2027	up
252	pmp000127	C28H32O16	Chrysoeriol-6,8-di-C-glucoside	1.61468	0.69125	up
253	Latp006670	C15H20O3	Telekin	2.85881	1.51541	up
254	Lsmp010418	C13H22O3	Corchoionol A	1.63549	0.709723	up
255	mws2212	C9H8O4	Caffeic acid	0.442069	-1.17766	down
256	Lmcp003522	C12H10O4	Baldrinal	1.64375	0.716994	up
257	Ymjm000148	C14H20O7	Salidroside	1.74569	0.8038	up
258	pme3255	C11H14O2	Methyleugenol	1.45084	0.53689	up
259	pmp000011	C20H28O6	Argyinolide H	2.77501	1.4725	up
260	Lssp210438	C16H12O6	3'-O-methylorobol(ISO1)	1.54127	0.624116	up
261	MWSmce025	C16H18O10	Fraxetin-8-O-glucoside (Fraxin)	3.71801	1.89453	up
262	Hmsn002272	C15H20O8	Demethyl coniferin	0.625171	-0.677678	down
263	Cmdn003997	C25H38O17	6'-O-α-D-galactosylbarlerin*	1.75533	0.811746	up
264	Hmsn001911	C13H18O8	Idesin	0.712615	-0.488805	down
265	mws0943	C7H8N2O2	1,4-Dihydro-1-Methyl-4-oxo-3-pyridinecarboxamide	1.72069	0.782986	up
266	Zjxp110316	C15H22O4	2β,3α-Dihydroxycostic acid*	1.99248	0.994565	up
267	Hmlp003068	C27H30O17	Meratin	2.42016	1.2751	up
268	pmn001421	C16H18O8	3-O-p-Coumaroylquinic acid*	3.03331	1.60089	up
269	Hmcp009963	C11H18NO+	Candicine	0.669162	-0.579573	down
270	Zmdn004052	C21H20O10	Aloe emodin-1-O-glucoside	1.52396	0.607821	up
271	MWSHY0165	C22H24O10	Isosakuranetin-7-O-glucoside (Isosakuranin)	1.59755	0.675859	up
272	MWS2091	C8H10O	1-Phenylethanol	1.51312	0.597527	up
273	pme1841	C5H14N2	Cadaverine	1.78602	0.83675	up
274	Wbmp010456	C18H28O2	Macrophypene B	0.620058	-0.689525	down
275	Lmcp007199	C11H10	2-Methylnaphthalene	0.654355	-0.611854	down
276	mws0040	C15H10O4	Chrysin	1.51617	0.60043	up
277	Zmsn004957	C27H42O12	Ixerisoside N	1.78393	0.835061	up
278	Wbsp000203	C31H52O5	3-O-acetyltohogenol	3.39367	1.76285	up
279	MW0136833	C15H10O4	7,3'-Dihydroxyflavone	4.17236	2.06086	up
280	MW0138842	C15H14O4	Luvangetin	1.92328	0.943565	up
281	Zbjn003642	C22H28O13	1-O-rhamnose-3-O-Caffeoyl Quinic Acid	1.66065	0.731744	up
282	Lmsn012627	C30H46O4	2,3-Dihydroxyurs-12,18-dien-28-oic acid*	2.37143	1.24576	up
283	Lmdp004307	C23H26O10	Farrerol-7-O-glucoside	1.55717	0.638927	up
284	Wchn003984	C16H18O8	Alpha-Hydrojuglone 4-Glucoside	3.144	1.6526	up
285	Smmp010394	C17H22O4	Epitulipinolide	0.711064	-0.491948	down
286	Lmyp004022	C28H24O15	Kaempferol-3-O-(2''-galloyl)glucoside	1.79956	0.847642	up
287	Zmhp002814	C16H12O6	5,7,8-Tetrahydroxy-6-methoxyflavone*	1.64415	0.717345	up
288	HJN086	C21H22O11	Eriodictyol-3'-O-glucoside	1.6443	0.717477	up
289	pmp001166	C16H12O7	Irilin D	1.49382	0.579007	up
290	HJAP165	C18H33NO	N-Isobutyl-2,4-tetradecanedienamide	0.694606	-0.525733	down
291	Wayp004564	C9H11NO3	4-hydroxy-4-(3-pyridyl)-butanoic acid	0.357702	-1.48317	down
292	pmb0782	C5H11N	Piperidine	1.83056	0.872285	up
293	Zbjn005476	C34H30O15	1,3,4-Tri-O-Caffeoyl Quinic Acid	2.18727	1.12913	up
294	mws0913	C21H20O11	Kaempferol-3-O-galactoside (Trifolin)*	1.90678	0.931137	up
295	Lmhn004030	C15H14O6	5,7,3',4',5'-Pentahydroxyflavan (Tricetiflavan)	2.25937	1.17592	up
296	Lmgn002933	C18H18O7	5,7-Dihydroxy-2',3',4'-trimethoxydihydroisoflavone	1.74642	0.804404	up
297	Lmfn000604	C13H16O10	6-O-Galloyl-β-D-glucose*	1.91545	0.93768	up
298	Cmhp005227	C16H18O8	4,8-Dihydroxy Naphthol-1-O-glucoside	3.99799	1.99928	up
299	Smcp000882	C15H21NO7	N-benzoyl-2-aminoethyl-β-D-glucopyranoside	1.4842	0.569685	up
300	Jmzn006005	C10H10O3	3,4-Methylenedioxy cinnamyl alcohol	1.78752	0.837959	up
301	pmb3045	C23H22O13	Tricin-7-O-Glucuronide	0.66607	-0.586255	down
302	Qmyp122014	C15H20O3	Pterodnic acid(ISO1)	2.74609	1.45738	up
303	pmp001227	C12H16O2	Senkyunolide A	1.86843	0.901825	up
304	mws1329	C21H20O12	Quercetin-7-O-glucoside*	1.56361	0.644876	up
305	MWSmce041	C12H14O2	Butylphthalide	2.56893	1.36117	up
306	mws1002	C17H14O8	Syringetin	1.68821	0.755493	up
307	MWSmce528	C9H10O3	2,3-Dimethoxybenzaldehyde	2.0679	1.04817	up
308	MWSmce248	C9H8O3	3-Hydroxycinnamic Acid*	2.67473	1.41939	up
309	Zbln001290	C14H20O9	β-Hydroxy-(3,4-dihydroxyphenylethanolyl)-glucoside	2.37208	1.24615	up
310	mws1297	C13H18O6	Benzyl glucoside	0.647954	-0.626037	down
311	Cmbn004440	C25H28O13	10-O-[(E)-Caffeoyl]-geniposidic acid	0.706865	-0.500494	down
312	Lmwp102713	C14H16O5	(S)-Peucedanol	1.84478	0.883446	up
313	pmb0772	C19H18N2O2	N-Cinnamoylserotonin	0.464379	-1.10663	down
314	MWSprf048	C12H20O2	Linalyl Acetate	1.54348	0.626186	up
315	Wacn002352	C22H26O16	2-O-(1'-O-glucosylFeruloyl)hydroxycitric Acid	1.44047	0.526537	up
316	pmb2654	C19H27NO12	Anthranilate-1-O-Sophoroside	1.92004	0.941136	up
317	Cmsp003083	C26H32O11	Dehydrodiconiferyl alcohol-4-O-glucoside*	2.05377	1.03828	up
318	Qmyp101223	C15H24O2	1β-Hydroxy-α-cyperone	1.61703	0.69335	up
319	Lmjp009373	C15H16O	Pyrocurzerenone	0.589519	-0.762389	down
320	Zmhn001257	C21H24O11	Catechin-5-O-glucoside	1.60145	0.679381	up
321	MW0002106	C13H10O5	2,3',4,6-Tetrahydroxybenzophenone	0.111734	-3.16186	down
322	pmp001106	C27H30O15	Vitexin-2''-O-glucoside	1.59098	0.669912	up
323	Wagp009430	C18H19NO2	N-(4-methoxyphenethyl)cinnamamide	2.44195	1.28803	up
324	Zmpn004713	C15H10O7	Isoetin (5,7,2',4',5'-Pentahydroxyflavone)	1.55517	0.637069	up
325	Lafp005308	C15H16O3	Encelin	128470	16.9711	up
326	Lmgp003989	C25H22O11	Dicaffeoylshikimic acid	1.4714	0.557189	up
327	Zmdn004764	C24H30O11	Syringopicroside	0.342999	-1.54373	down
328	pmn001419	C15H18O8	1-O-p-Coumaroyl-β-D-glucose	1.61652	0.692893	up
329	mws0048	C21H20O10	Apigenin-8-C-Glucoside (Vitexin)	0.23319	-2.10042	down
330	Lmzn001894	C21H18O12	Kaempferol-3-O-glucuronide	1.53051	0.614016	up
331	MW0112865	C11H14O	Isovalerophenone	2.06506	1.04618	up
332	Lskp211273	C26H32O11	trachelosiaside	1.61472	0.691288	up
333	mws0089	C21H20O11	Kaempferol-7-O-glucoside*	1.5265	0.61023	up
334	pmb0130	C12H14N2O	Acetryptine	1.67206	0.74163	up
335	Lsmp010410	C27H28O12	Ethyl 1,4-di-O-caffeoylquinate	1.71117	0.774984	up
336	Latp005372	C15H18O4	Caroguaianolide A	1.58159	0.661379	up
337	pme3233	C16H12O5	Calycosin	1.61839	0.69456	up
338	HJN090	C21H22O10	Butin-7-O-glucoside*	1.45811	0.5441	up
339	mws1503	C9H8O	Cinnamaldehyde	1.98802	0.991331	up
340	Zmhn001793	C15H18O9	6-O-Caffeoyl-D-glucose	1.50385	0.588661	up
341	MWSHY0142	C28H24O16	Quercetin-3-O-(2''-O-galloyl)galactoside	0.379563	-1.39759	down
342	Hmln002996	C29H36O16	β-Hydroxyacteoside	1.94014	0.956158	up
343	pmb0618	C28H34O16	Hesperetin-8-C-glucoside-3'-O-glucoside	2.0674	1.04782	up
344	mws0856	C21H20O12	Quercetin-4'-O-glucoside (Spiraeoside)*	1.58444	0.663971	up
345	MW0139323	C15H14O4	Peucedanin	3.04722	1.60749	up
346	pmp000087	C13H16O6	2-Feruloyl-sn-glycerol*	8.34504	3.06092	up
347	pma6460	C16H18O8	4-O-p-Coumaroylquinic acid	4.68687	2.22863	up
348	Lmfn005654	C15H10O11S	Myricetin-3-O-sulfonate	1.71458	0.777852	up
349	pmb2833	C23H30O14	3-O-Feruloylquinic acid-O-glucoside	772.598	9.59357	up
350	HJAP026	C28H32O16	Chrysoeriol-6-C-glucoside-4'-O-glucoside	1.87528	0.907104	up
351	Lmyn003028	C19H28O11	Benzyl-β-gentiobioside*	1.44243	0.528503	up
352	pma0104	C20H16O7	N-Sinapoylhydroxycoumarin	4.47635e-05	-14.4473	down
353	Hmhn000927	C12H16O8	Phloroglucinol-1-O-β-D-glucopyranoside	1.52258	0.606519	up
354	Smpn002867	C10H14O2	9-hydroxythymol	1.92779	0.946948	up
355	Zbsn012366	C30H48O3	Oxyallobetulin	3.14695	1.65395	up
356	MWSmce644	C11H12O4	4-Acetoxy-3-Ethoxybenzaldehyde	1.50802	0.592652	up
357	Smcn000644	C14H20O9	Leonuriside A	1.47981	0.565413	up
358	pme1598	C22H24O11	Hesperetin-5-O-glucoside	1.46552	0.551417	up
359	Hmcn001884	C21H20O12	6-Hydroxyluteolin 5-glucoside	1.44336	0.529428	up
360	Zmcn005156	C26H26O12	4,5-O-Dicaffeoylquinic Acid Methyl Ester	4.36855	2.12715	up
361	pmn001704	C30H46O4	2,3-Dihydroxy-5(6),12(13)-diene-ursolic acid*	2.1817	1.12545	up
362	Hmcp003285	C15H20O3	Santamarin	2.77458	1.47227	up
363	Lmap001823	C14H17NO7	Dhurrin	3.15482	1.65756	up
364	MWSHY0031	C21H18O11	Apigenin-7-O-glucuronide	2.11739	1.08229	up
365	Zmtp009051	C14H16O2	Liguhodgsonal	1.62951	0.704437	up
366	pmb0819	C10H8N2	3-Indoleacetonitrile	0.690772	-0.533719	down
367	pmp001105	C33H40O20	Kaempferol-3-O-neohesperidoside-7-O-glucoside*	2.54694	1.34876	up
368	Lmsp003161	C33H40O20	Kaempferol-3-O-sophoroside-7-O-rhamnoside*	2.54694	1.34876	up
369	HJAP135	C24H24O12	Pinocembrin-7-O-(6''-O-malonyl)glucoside	2.20901	1.1434	up
370	Hmhn002787	C21H32O10	(1'R,3R,5R,8'S)-Dihydrophaseic acid-O-β-D-glucoside	0.630409	-0.66564	down
371	pmp001244	C14H20NO4+	Caffeoylcholine	0.702474	-0.509484	down
372	pmb3012	C22H22O11	Chrysoeriol-7-O-glucoside	1.59161	0.670487	up
373	Lmjn004991	C15H24O5	Dihydro Artemisinin-D3	2.25134	1.17078	up
374	MW0135136	C15H10O6	6,7,3',4'-Tetrahydroxyflavone	1.50693	0.591614	up
375	Smsp110188	C15H22O2	isopolygodial	2.75385	1.46145	up
376	MWS20145	C21H22O11	Eriodictyol-7-O-glucoside	1.63797	0.711906	up
377	pmp000906	C15H16O	Dihydroylindesteolene	0.695383	-0.524119	down
378	HX1360	C10H8O3	7-methoxycoumarin	2.90864	1.54034	up
379	Lmmn004912	C16H12O7	3-O-Methylquercetin	2.0903	1.06371	up
380	Wasn006251	C20H20O10	Shomaside F	1.65458	0.726463	up
381	Wbmp003302	C10H12O2	Frambinone	1.57567	0.655967	up
382	MW0103150	C15H22O	Xanthorrhizol	0.679507	-0.557439	down
383	mws0983	C20H39NO2	N-Oleoylethanolamine	0.671827	-0.573838	down
384	Zahp010142	C14H25NO	isopellitorine	0.706235	-0.501779	down
385	pmb0571	C26H28O14	Apigenin-7-O-(2''-glucosyl)arabinoside	0.601828	-0.732578	down
386	Lmzp003012	C18H18O6	3-Hydroxy-4',5,7-Trimethoxyflavanone	2.02003	1.01438	up
387	MWSCX013	C30H48O5	2,3,19-trihydroxyurs-12-en-28-oic acid (Euscaphic acid)	1.90465	0.929522	up
388	pme2987	C9H8O2	3,4-Dihydrocoumarin	1.93952	0.955697	up
389	pmn001378	C26H32O11	Pinoresinol-4-O-glucoside	1.5086	0.593207	up
390	Wafn002874	C22H28O14	4-O-(4'-O-alpha-D-Glucopyranosyl)caffeoylquinic acid	2.29921	1.20114	up
391	Wbmn00859	C20H16O8	vitelignin A	2.21625	1.14812	up
392	pmb0639	C33H40O20	Apigenin-8-C-glucoside-7-O-Sophoroside	3.55211	1.82868	up
393	HJN106	C30H46O5	2-Carboxy-3-hydroxy-A(1)-norlupan-20(29)-en-28-oic acid (Ceanothic acid)	3.94527	1.98013	up
394	Zmhn002422	C16H20O9	1-O-Feruloyl-β-D-glucose	1.70057	0.766023	up
395	Lmpn007255	C16H12O8	Patuletin (Quercetagetin-6-methyl ether)	1.79207	0.84163	up
396	pmp000013	C24H26O12	Eupatilin-7-O-glucoside	2.11214	1.07871	up
397	pmp000120	C22H22O11	Diosmetin-6-C-glucoside	1.98125	0.98641	up
398	MW0135803	C21H18O12	Luteolin-7-o-glucuronide	1.67044	0.740225	up
399	Lhmp122023	C19H20O12	3-O-caffeoyl malonyl quinic acid	1.49837	0.583398	up
400	MWSmce455	C9H10O4	Vanillic acid methyl ester	1.69601	0.762141	up
401	Lssp210123	C20H20O6	α-Conidendrin	1.45313	0.539162	up
402	Lmsn008908	C30H48O7	2,3,19,23,24-Pentahydroxyolean-12-en-28-oic acid	1.93581	0.952936	up
403	Yajn002315	C22H28O14	4-O-(3'-O-alpha-D-Glucopyranosyl)caffeoylquinic acid	1.72937	0.79025	up
404	pmp000005	C20H22O5	Moxartenolide	1.79563	0.844494	up
405	Wasn006584	C20H20O11	1-Galloyl-6-O-Benzoyl Glucose	2.90488	1.53848	up
406	Lmcp004624	C16H12O6	3-Methylkaempferol	1.40048	0.485917	up
407	Lhnp111712	C20H24O5	Methylaguerin B	2.07977	1.05643	up
408	pmb0623	C28H32O16	Chrysoeriol-6-C-glucoside-7-O-glucoside	1.48992	0.575231	up
409	Wbjp002336	C16H18N2O5	N,N-diethyl-5-hydroxytryptamineoxalate	1.51819	0.602351	up
410	MWSHY0035	C21H18O12	Scutellarein-7-O-glucuronide (Scutellarin)	1.9485	0.962365	up
411	Lmtn002324	C19H28O11	Benzyl-(2''-O-glucosyl)glucoside*	1.60833	0.685563	up
412	Li512114	C31H50O4	2,3-Dihydroxyurs-12-en-28-oic acid methyl ester (Corosolic acid methyl ester)	3.15624	1.65821	up
413	Lajp006434	C24H26O12	3',5'-dihydroxy-5,7,4'-trimethoxyflavone glucoside	2.07919	1.05602	up
414	Cmbp005523	C21H20O9	1,3-O-Dicaffeoylglycerol	1.43065	0.516666	up
415	Lmmp003487	C27H26O18	Luteolin-7-O-glucuronide-(2→1)-glucuronide	2.30171	1.2027	up
416	Lmhn004756	C23H20O10	Cinnamoylferuloyltartaric acid	1.41361	0.499385	up
417	Cmxp004324	C24H24O14	Okanin-4'-O-(6''-O-malonyl)glucoside	1.64346	0.716738	up
418	pmn001342	C23H20O12	Rhein-8-O-(6'-O-acetyl)glucoside	0.667736	-0.58265	down
419	Lscp211208	C19H32O7	Alangionoside L	3.17182	1.66531	up
420	Lxmp122302	C19H32O7	Dehydroxyampelopsisionoside	3.17182	1.66531	up
421	pmn001382	C25H24O12	Isochlorogenic acid A*	1.58904	0.668154	up
422	pmb0382	C19H14O6	O-Feruloyl 4-hydroxycoumarin	1.52169	0.605677	up
423	Lmbn002737	C8H8O	3-Methylbenzaldehyde*	1.43095	0.516974	up
424	HJAP024	C27H30O16	Kaempferol-6,8-di-C-glucoside	2.22427	1.15333	up
425	Hmpn005101	C21H24O11	Sieboldin	2.63026	1.3952	up
426	mws1383	C12H10N4O2	Lumichrome	2.49703	1.32022	up
427	Hmpp103270	C21H20O12	Eriodictyol-7-O-glucoronide	1.80311	0.850486	up
428	Zmhp002640	C33H40O21	6-Hydroxykaempferol-3-O-Rutinoside-6-O-glucoside	1.67611	0.745118	up
429	Lmmp002334	C33H40O21	Quercetin-3-O-rutinoside-7-O-glucoside	1.67611	0.745118	up
430	Wahp004841	C22H24O11	Homeriodictyol-7-O-β-O-glucoside	1.44086	0.526933	up
431	Lmyn005006	C30H28O13	Eriodictyol-7-O-(6''-O-p-coumaroyl)glucoside	1.56523	0.646376	up
432	Jmwn002172	C14H20O8	3,4-dihydroxyphenylethanol-β-D-glucopyranoside	1.45299	0.539028	up
433	pmp001289	C28H28O18	Chrysoeriol-7-O-(2''-O-glucuronyl)glucuronide	0.709399	-0.49533	down
434	pmp000663	C21H30O3	Tussilagonone	0.676709	-0.563392	down
435	pmf0256	C6H14O	3-Methyl-1-pentanol	1.40353	0.489056	up
436	Jmwn002117	C14H20O9	2-(3,4-dihydroxyphenyl)ethanediol 1-O-β-D-glucopyranoside	1.46861	0.554456	up
437	Hmln000873	C13H16O10	2-O-Galloyl-D-glucose	1.56601	0.64709	up
438	pmb0490	C13H18N2O2	p-Coumaroylputrescine	2.20671	1.1419	up
439	mws1299	C21H20O11	Luteolin-8-C-glucoside (Orientin)*	2.25665	1.17419	up
440	mws0178	C16H18O9	Chlorogenic acid (3-O-Caffeoylquinic acid)*	4.60273	2.20249	up
441	MWSslk064	C10H10O5	Dimethyl 4-Hydroxyisophthalate	1.44231	0.528384	up
442	Smhp004476	C26H28O14	Isovitexin-2''-O-xyloside	0.541045	-0.88618	down
443	Lmdp003146	C10H14O2	Rhododendrol	39867.8	15.2829	up
444	MWSmce558	C19H20O6	Diosbulbin B	1.55617	0.637998	up
445	Qmqp102524	C15H18O5	Tanaphillin	1.4987	0.583716	up
446	Lkmp122714	C19H30O8	Sonchuionoside A	1.57752	0.657658	up
447	MWSmce001	C9H8O4	5-Acetylsalicylic acid	1.92882	0.947715	up
448	Cmap003488	C32H36O8	Artanomaloide	1.6532	0.72526	up
449	Zmxp003107	C27H30O16	Luteolin-7,3'-di-O-glucoside*	1.5096	0.594163	up
450	Lmtp002642	C26H28O14	Apigenin-8-C-(2''-glucosyl)arabinoside	2.04411	1.03147	up
451	HJAP104	C7H6O	Benzaldehyde	2.09926	1.06988	up
452	mws1074	C9H6O4	Daphnetin	0.489919	-1.02938	down
453	Lmtp003569	C8H9NO2	(R)-Mandelamide	0.469345	-1.09128	down
454	mws1073	C27H30O15	Apigenin-6,8-di-C-glucoside (Vicenin-2)	1.43916	0.525227	up
455	MWS20147	C21H20O11	Luteolin-3'-O-glucoside*	1.68717	0.754608	up
456	MW0130930	C9H6O3	3-Hydroxycoumarin	1.84454	0.883264	up
457	Zbjn003262	C31H34O17	3,4-O-di-Caffeoyl-1-O-glucoside Quinic Acid	1.59418	0.672812	up
458	Zmcn003729	C26H32O12	1-Hydroxypinoresinol-4'-O-Glucoside	2.32817	1.2192	up
459	Hmmn002544	C16H20O9	Ferulic acid-4-O-glucoside	1.76792	0.822057	up
460	mws1660	C26H28O14	Schaftoside	1.95132	0.96445	up
461	zjgp122321	C16H18O9	4-O-acetyl-3-O-caffeoyl-2-C-methyl-D-erythronate	2.08599	1.06073	up
462	pmp001245	C15H22NO4+	Feruloylcholine	1.58809	0.667293	up
463	MWSHC2041	C27H30O14	sophorabioside	1.70389	0.768833	up
464	Lmdp003110	C15H12O6	2,6,7,4'-Tetrahydroxyisoflavanone	1.88294	0.912989	up
465	Smhp003438	C27H30O16	Luteolin-6,8-di-C-glucoside	2.40705	1.26726	up
466	mws2108	C16H18O9	Cryptochlorogenic acid (4-O-Caffeoylquinic acid)*	1.69583	0.761993	up
467	Wmzn000627	C22H36O4	Ajugalaevigatic acid	0.695655	-0.523556	down
468	Lmsn000363	C16H22O7	Raspberryketone glucoside	1.80937	0.855487	up
469	mws1521	C13H18O7	Salicin	1.64924	0.721801	up
470	Lmnp003080	C26H28O14	Hispidulin-8-C-(2''-O-xylosyl)xyloside	0.538945	-0.891789	down
471	Zmcp002666	C27H30O17	Quercetin-3,7-Di-O-glucoside	2.22586	1.15436	up
472	Qmqp102518	C15H16O3	Dehydroleucodine	1.45774	0.543731	up
473	Wacn003131	C15H14O10	2-O-P-Coumaroylhydroxycitric Acid	1.90754	0.931717	up
474	Hmqn003268	C15H12O7	5,7,3',4',5'-Pentahydroxydihydroflavone	1.73294	0.793225	up
475	Qmqp101743	C36H42O11	Sarcandrolide B	2.60655	1.38214	up
476	pme1816	C16H18O9	Neochlorogenic acid (5-O-Caffeoylquinic acid)*	1.68636	0.753912	up
477	MWS2009	C9H12O3	1,3,5-Trimethoxybenzene	0.521595	-0.938998	down
478	pma0692	C25H31N3O4	N1,N10-Bis(p-coumaroyl)spermidine	2.28998	1.19534	up
479	Lacp003788	C17H20O9	Amurenlaetone A	5.27116	2.39812	up
480	Lcmp123017	C10H14O2	Dihydrohinokitiol	1.44818	0.534242	up
481	MWSmce700	C6H8N2	2-Ethylpyrazine	1.49952	0.584496	up
482	Cmhp002692	C28H32O17	Madreselvin A	2.01989	1.01428	up
483	pmp000014	C35H40O8	Arteminolide B	2.47653	1.30832	up
484	pmn001637	C20H18O10	Kaempferol-3-O-arabinoside (Juglanin)	1.60613	0.683587	up
485	pmb0706	C30H32O20	Quercetin-3-O-(6''-O-malonyl)glucosyl-5-O-glucoside	1.69533	0.761564	up
486	Qmjp112201	C21H30O9	Lanceocrepidiaside A	5.24995e-05	-14.2173	down
487	pmb0631	C26H28O15	Orientin-6-C-arabinoside	3.37044	1.75294	up
488	Zmap008189	C17H26O5	Blumeaene L	1.5577	0.639418	up
489	MW0148348	C6H8O7	D-galactaro-1,4-lactone	1.65474	0.726606	up
490	Zjxp110315	C15H22O4	2β,5α-Dihydroxyisocostic acid*	1.90664	0.931035	up
491	Lhfp110335	C20H28O4	6-Angeloylfuranofukinol(iso-05)	0.634062	-0.657305	down
492	Lmbn002644	C8H8O	4-Methylbenzaldehyde*	1.76348	0.818422	up
493	Lmsp003655	C26H32O11	Dehydrodiconiferyl alcohol-gamma'-O-glucoside*	1.55112	0.633307	up
494	Qmdp112410	C21H36O3	Vitetrifolin H	2.17021	1.11783	up
495	pmp000193	C24H22O12	6''-O-Malonyldaidzin	2.03063	1.02193	up
496	pmn001511	C13H18O7	3-Hydroxy-5-Methylphenol-1-O-Glucoside	1.45368	0.539711	up
497	pmp001311	C27H30O17	6-Hydroxykaempferol-7,6-O-Diglucoside	2.06438	1.04571	up
498	Lmgn002253	C31H36O18	Syringoylcaffeoylquinic acid-D-glucose	1.63797	0.711908	up
499	Cmjp002257	C15H16O4	8-Deoxylactucin	1.42488	0.510844	up
500	HJAP011	C22H22O11	Chrysoeriol-8-C-glucoside (Scoparin)	1.51475	0.599075	up
501	pmn001525	C23H26O11	3,5-Digalloylshikimic acid	1.51562	0.599905	up
502	Lmyp003599	C28H24O15	Kaempferol-3-O-(6''-galloyl)glucoside*	5.54557e-05	-14.1383	down
503	Lmmp000897	C30H26O14	Gallocatechin-(4α→8)-gallocatechin	1.82233	0.865783	up
504	Lmwp003442	C21H20O11	Amoenin	1.58807	0.667275	up
505	Cmxn004016	C21H24O11	Dihydromarein	2.24978	1.16978	up
506	pmb0752	C17H20O9	3-O-Feruloylquinic acid	2.05527	1.03932	up
507	pma3724	C17H20O9	1-O-Feruloylquinic acid	2.29218	1.19672	up
508	Waxn004840	C29H28O16	1,5-O-dicaffeoyl-3-O-maloyl-quinic acid	1.941	0.956799	up
509	Latp005079	C15H22O4	Ivaxillin	2.85722	1.51461	up
510	Jmcn007353	C15H22O4	1β,9β-dihydroxy-4αH-eudesmane-5,11(13)-dien-12-oic acid	2.49373	1.31831	up
511	Hmqn000843	C13H18O8	Tachioside*	1.89142	0.919467	up
512	HJAP046	C12H14O5	1-(2,4,5-Trimethoxyphenyl)-1,2-propanedione	1.58499	0.664472	up
513	Lmtn002997	C22H22O13	Mearnsetin-3-O-glucoside	0.601483	-0.733403	down
514	Hmjp003008	C27H28O16	Luteolin-7-O-glucuronide-5-O-rhamnoside	1.47807	0.563716	up
515	Hmqp003066	C35H40O23	Luteolin-7-O-(6'''-malonyl)sophoroside-5-O-arabinoside	0.236227	-2.08175	down
516	zjhp111803	C14H11NO2	methyl carbazole-3-carboxylate	2.00695	1.005	up
517	Lmtp002822	C25H26O13	Apigenin-6-C-arabinoside-8-C-xyloside*	2.74768	1.45822	up
518	mws0748	C16H18O9	1-Caffeoylquinic acid	0.412809	-1.27645	down
519	Lmjp003731	C26H26O12	3,4-O-Dicaffeoylquinic Acid Methyl Ester*	2.2881	1.19415	up
520	Lmzn001983	C16H24O10	D-Threo-guaiacylglycerol-7-O-β-D-glucoside	0.463386	-1.10971	down
521	HJAP148	C26H28O15	Kaempferol-3-O-sambubioside	0.450008	-1.15198	down
522	Qatp004010	C15H20O3	Micheliolide	1.761	0.816391	up
523	MWS20178	C11H10O5	isofraxidin	2.33248	1.22186	up
524	Hmcp001658	C31H34O20	Isorhamnetin-3-O-(6''-malonyl)glucoside-7-O-glucoside	1.60576	0.683258	up
525	Lhkp101525	C20H24O12	Apiosylskimmin	2.17734	1.12256	up
526	pmb0681	C20H18O9	Apigenin-8-C-Arabinoside	3.87284	1.95339	up
527	Rfmb25702	C28H34O12	Pinoresinol-4-O-(6''-acetyl)glucoside	0.681655	-0.552886	down
528	pmp000602	C19H22O9	6-Hydroxymusizin-8-O-β-D-glucoside	0.630771	-0.664811	down
529	Lmtp002942	C25H26O13	Apigenin-6,8-di-C-arabinoside*	1.9494	0.963034	up
530	Lmyp003500	C28H24O15	Kaempferol-3-O-(2''-galloyl)galactoside*	2.29338	1.19747	up
531	Lmyp003348	C28H24O15	Kaempferol-3-O-(6''-galloyl)galactoside*	2.29338	1.19747	up
532	Lmsn004321	C22H22O13	1-O-Caffeoyl-3-O-galloyl-β-D-glucose	4.68247	2.22727	up
533	Hmap001882	C39H50O26	Kaempferol-3-O-sophorotrioside-7-O-glucoside	0.409428	-1.28832	down
534	Wayn002532	C12H14O9	Gallic acid-1-O-xyloside	2.56725	1.36022	up
535	mws1454	C23H26O11	Persicoside	1.40737	0.493003	up
536	Zbqn005083	C26H28O14	Lucidin primeveroside	0.437758	-1.1918	down
537	Zmhp002431	C27H30O15	saffloquinoside A	1.84289	0.88197	up
538	mws4108	C21H20O5	1-Methoxyphaseollin	0.492786	-1.02097	down
539	MWSmce229	C9H10O4	3,4-Dimethoxybenzoic acid; Veratric acid	1.71989	0.782319	up
540	Lmyn001269	C27H30O16	Kaempferol-3-O-sophoroside	1.74918	0.806681	up
541	Lmmp006709	C30H26O12	Kaempferol-3-O-(4''-p-coumaroyl)rhamnoside	3.23199	1.69242	up
542	Zmtp007670	C15H16O2	1-Oxo-9-desoxycacalol	0.643174	-0.636719	down
543	Zmjp003291	C27H30O15	Vitexin-2''-O-galactoside	1.94482	0.95964	up
544	Zbzp003763	C10H8O3	11-methoxy viburtinal	2.7	1.43296	up
545	pmb3002	C28H32O15	Chrysoeriol-7-O-rutinoside	0.314879	-1.66713	down
546	Zbjn003605	C31H34O17	1,4-O-di-Caffeoyl-3-O-glucoside Quinic Acid*	1.98901	0.992049	up
547	Lmmp005125	C16H14O4	Pinostrobin Chalcone	0.289774	-1.787	down
548	MWSHY0064	C28H32O16	Isorhamnetin-3-O-neohesperidoside*	3.03989	1.60402	up
549	Lmfn004235	C18H16O8	Myricetin-3,7,3'-trimethyl ether	1.75917	0.814897	up
550	mws0612	C10H12O4	3,4-Dimethoxyphenyl acetic acid	2.23584	1.16082	up
551	Hmcp001618	C32H38O20	Quercetin-3-O-(2''-O-Xylosyl)rutinoside	0.663932	-0.590893	down
552	Cmjp004550	C17H26O10	Loganin	3.45838	1.7901	up
553	MWSHY0016	C21H20O11	Luteolin-6-C-glucoside (Isoorientin)*	2.11939	1.08365	up
554	Lmjp002764	C11H10O5	Umckalin (7-hydroxy-5,6-dimethoxycoumarin)	2.77165	1.47075	up
555	Hmpp003270	C21H20O11	Luteolin-4'-O-glucoside*	2.37957	1.2507	up
556	Latp003285	C17H20O8	2,5-Dimethyl-7-hydroxychromone glucoside	0.210133	-2.25063	down
557	pmp000509	C6H6O3	Maltol	1.43362	0.519667	up
558	pmb0566	C26H28O15	Luteolin-7-O-glucoside-5-O-arabinoside	0.552184	-0.85678	down
559	MWSHY0135	C28H32O16	Isorhamnetin-3-O-rutinoside (Narcissin)*	2.95827	1.56475	up
560	Lman003972	C21H22O10	6-O-Caffeoylarbutin	0.33188	-1.59127	down
561	pmp000236	C26H28O14	Isovitexin-8-O-xyloside	2.57751	1.36598	up
562	Cmpn007831	C15H22O4	Arsanin	3.22507	1.68933	up
563	pmb0636	C26H28O15	Orientin-7-O-arabinoside	2.45645	1.29657	up
4EF vs 8EF
	Index	Formula	Compounds	Fold_Change	Log2FC	Type
1	Lmjn005765	C15H22O3	Dihydro-epi-arteannuin B	1.65407	0.726022	up
2	Zmwp007375	C15H18O2	Dehydrocostuslactone	0.689823	-0.535701	down
3	Lmcp007655	C15H20O2	Atractylenolide Ⅱ	1.55179	0.633935	up
4	MWS2032	C7H8N2O	6-Methylnicotinamide	2.1727	1.11949	up
5	Wagp001741	C19H28N2O9	N-(gamma-L-glutamyl)tyramine O-glucoside	3.16261	1.66112	up
6	zjbp111621	C15H20O2	12,15-dioxo-α-selinen	1.49719	0.582256	up
7	Wahp006113	C24H26O12	Rhamnazine-4'-O-β-D-glucoside	0.444854	-1.1686	down
8	pmp000588	C25H24O14	Diosmetin-7-O-(6''-malonyl)glucoside	1.44433	0.530402	up
9	Lwhp010633	C10H9NO	Echinopsine	0.418915	-1.25527	down
10	Zmgp005070	C24H26O13	Centaurein	1.51327	0.597673	up
11	pmp000661	C15H22O	Cryptomerione	1.49537	0.5805	up
12	MWSmce564	C15H22O	Germacrone	1.64171	0.715195	up
13	pme3459	C20H28O3	Cafestol	1.59687	0.67525	up
14	Zmhn003059	C16H12O5	Emodin-1-methyl ether	0.652126	-0.616778	down
15	Zaxn005652	C20H28O3	Pisiferic acid	1.62228	0.698022	up
16	Zaxn005783	C21H32O2	Methyl neoabietate	1.62228	0.698022	up
17	Wahp005790	C34H37N3O7	Di-p-coumaroylcaffeoyl Spermidine	0.470545	-1.08759	down
18	zjgp122326	C12H15NO7	Pyridine-4-formyl-O-β-D-glucopyranoside	3.28823	1.71731	up
19	pmf0440	C10H10O2	4-MethoxycinnaMaldehyde	1.45076	0.536808	up
20	pmp000017	C12H12O2	Butylidenephthalide	0.699413	-0.515784	down
21	Zmsp002551	C21H30O9	Ixerin D	2.3708	1.24537	up
22	Wayn001856	C13H16O11S	4-Hydroxybenzoic acid 4-(6-O-sulfo)glucopyranoside	1.84012	0.879796	up
23	Lthp012010	C15H18O3	Zaluzanin C	0.521725	-0.93864	down
24	MWS0687	C7H8N2O2	1-Methyl-6-Oxo-1,6-Dihydropyridine-3-Carboxamide	0.634019	-0.657402	down
25	pmp000243	C12H12O2	E-Butylphthalide	0.681308	-0.553622	down
26	MWSmce389	C12H16O3	Beta-asarone	1.687	0.754464	up
27	Lmrn003000	C9H10O3	2-Hydroxy-3-phenylpropanoic acid	0.668733	-0.580498	down
28	pmn001641	C22H20O12	Kaempferide-3-O-glucuronide	0.643232	-0.636589	down
29	Hmln001836	C29H32O17	Kaempferol-3-O-(6''-Acetyl)glucosyl-(1→3)-Galactoside	2.37064	1.24528	up
30	Lajp005898	C24H26O13	5,8,3'-trihydroxy-6,7,4'-trimethoxyflavone-8-O-β-D-glucoside	1.56206	0.643447	up
31	MWStz070	C9H11NO3	N-(2-Hydroxy-4-methoxyphenyl)acetamide	1.56986	0.65064	up
32	Wahp006114	C34H37N3O6	Tri-p-coumaroyl Spermidine	0.434393	-1.20293	down
33	Lacp004368	C22H34O11	Blumenol B malonyl Glucoside	0.712505	-0.489028	down
34	Qmxp101522	C20H30O2	Hinokiol(ISO2)	1.8612	0.896232	up
35	Wagp003518	C16H19NO7	Acetoxyindole N-Glucoside	1.62786	0.702973	up
36	HX1223	C15H24O	Germacra-1(10),4,7(11)-trien-9α-ol	1.65549	0.727262	up
37	mws1562	C15H22O10	Catalpol	0.688504	-0.538463	down
38	MWS20173	C15H24O2	1-Hydroxybisabola-2,10-dien-4-one	1.9245	0.944482	up
39	mws2105	C14H12O3	Benzyl salicylate	0.361059	-1.46969	down
40	Lmmn006306	C18H30O3	Machilusolide D	1.47465	0.56037	up
41	Zahp012121	C15H24O	1β-hydroxy-4(15),5E,10(14)-germacratriene	1.63834	0.712232	up
42	HJAP058	C19H20O6	5,6,7,4'-Tetramethoxyflavanone	0.513678	-0.961063	down
43	Lmzn001664	C27H28O17	Kaempferol-3-O-glucuronide-7-O-glucoside	1.8865	0.915711	up
44	pmb0501	C5H14N4	Agmatine	2.04496	1.03207	up
45	Zbsp005869	C18H16O7	7,4'-Dihydroxy-3,5,3'-trimethoxyflavone	0.554416	-0.850959	down
46	Ymmg000006	C15H22O5	Rugosic acid A	0.679293	-0.557895	down
47	mws0005	C10H12N2	Tryptamine	0.307945	-1.69925	down
48	pmc1990	C17H16O5	4'-Hydroxy-5,7-dimethoxyflavanone	0.0573238	-4.12472	down
49	zjhp111804	C14H13NO	3-methoxymethylcarbazole	1.4718	0.557582	up
50	pmb0626	C33H40O20	Apigenin-6-C-glucoside-7-O-Sophoroside	5.91919	2.5654	up
51	Llhp011701	C30H44O4	11,12-epoxy-13-hydroxy-3-Oxooleanane-28-oic acid gamma-lactone (Liquidambaric Lactone)	1.40634	0.49195	up
52	Lmtn003096	C26H36O11	Secoisolariciresinol 4-O-glucoside	0.696712	-0.521366	down
53	Hmyn000254	C18H18O4	Tababiphenyl C	2.76895	1.46934	up
54	Lmmp005689	C16H12O6	Cajanin	0.668559	-0.580872	down
55	pme1611	C21H22O10	Isohemiphloin	0.296814	-1.75237	down
56	Lmyp004407	C30H26O13	Kaempferol-3-O-(2''-p-Coumaroyl)galactoside*	4.91997	2.29865	up
57	Lcwp000595	C15H20O4	9alpha-Hydroxy-11beta,13-Dihydrozaluzanin C	0.656916	-0.60622	down
58	Cmxp005429	C15H12O6	Okanin	1.43007	0.516091	up
59	pmp000009	C18H16O8	Centaureidin (5,7,3'-Trihydroxy-3,6,4'-Trimethoxyflavone)	1.59394	0.672597	up
60	Hmcp004865	C15H20O2	Costunolide	1.57749	0.657629	up
61	pme2122	C5H9N3	Histamine	1.63116	0.705895	up
62	Lasp003235	C30H32O18	Genistein glucosyl malonyl glucoside	2.57056	1.36208	up
63	Lmmp003783	C21H18O13	Quercetin-3-O-glucuronide	1.43069	0.516715	up
64	pma2088	C27H30O17	Quercetin-3,4'-O-di-glucoside	2.88579	1.52896	up
65	mws1474	C18H16O7	5,7-Dihydroxy-3',4',5'-trimethoxyflavone	0.524259	-0.931648	down
66	Hmcp002316	C21H20O11	Isorhamnetin-3-O-arabinoside	0.71074	-0.492606	down
67	Lmmp003903	C23H22O12	Kaempferol-3-O-(2''-O-acetyl)glucoside	1.66084	0.73191	up
68	zjhp113024	C20H26O5	mollisorin A	1.74671	0.804636	up
69	Hmpp002612	C27H30O16	Luteolin-7-O-gentiobioside*	1.58944	0.668518	up
70	MW0052877	C15H24O	2-trans,6-trans-Farnesal	1.65887	0.730202	up
71	Lmzn001582	C18H28O9	5'-Glucosyloxyjasmanic acid	1.44472	0.530793	up
72	MWSmce584	C8H11NO	L-Tyramine	1.91406	0.936638	up
73	Wasn002329	C16H17NO9	Xanthurenic Acid 8-O-Glucoside	4.19215	2.06769	up
74	MW0137619	C25H24O11	Catechin pentaacetate	0.651744	-0.617623	down
75	Zblp001009	C12H17NO6	3-pyridine-methanol-O-β-D-glucopyranosyl	1.40719	0.492822	up
76	Cmap003986	C35H40O8	Arteminolide C	2.84458	1.50821	up
77	zjbp111620	C15H20O2	12,15-dioxo-selina-4,11-dine	1.56217	0.643551	up
78	MWSmce461	C4H7NO2	L-Azetidine-2-carboxylic acid	0.66686	-0.584543	down
79	Qmqp102534	C15H20O2	Isoalantolactone	1.435	0.521049	up
80	Hmjn008136	C30H46O4	2,3-Dihydroxyoleana-11,13(18)-dien-28-oic acid (Camaldulenic acid)	1.67567	0.744739	up
81	zjzp121504	C15H22O2	eupatorenone	1.45681	0.542813	up
82	Lmgp000659	C8H9NO	2-Phenylacetamide	1.53134	0.614791	up
83	Wasn003942	C16H28O9	Glucosyl 6,9-dihydroxydec-4-enoic acid	0.66568	-0.587098	down
84	MW0113161	C14H18N2O5	Musk ketone	2.37923	1.25049	up
85	Zbzp007301	C18H28O3	2-Methoxy-6-undecyl-1,4-benzoquinone	1.54943	0.631736	up
86	MW0131473	C17H14O8	5,7,3',4'-Tetrahydroxy-6,8-dimethoxyflavone	1.45123	0.537273	up
87	mws1509	C13H10O3	Phenyl salicylate	1.60077	0.678768	up
88	mws1013	C9H6O4	Esculetin (6,7-Dihydroxycoumarin)	0.687952	-0.53962	down
89	MW0132545	C15H10O5	3,7,4'-Trihydroxyflavone	0.627686	-0.671885	down
90	mws0987	C10H8O2	6-MethylCoumarin	1.42923	0.515238	up
91	Ladp002935	C10H7NO3	3-quinolinecarboxylic acid	1.57409	0.654515	up
92	Lmdp002381	C11H14O5	Genipin	1.46477	0.550673	up
93	HX1367	C9H6O2	coumarin(ISO2)	1.63949	0.71325	up
94	mws0791	C28H34O14	Poncirin (Isosakuranetin-7-O-neohesperidoside)*	0.681912	-0.552343	down
95	Wbsp004755	C10H10O3	Methyl Hydroxycinnamate	1.60221	0.68006	up
96	Smrp005771	C20H20O4	Licarin B	0.644558	-0.633618	down
97	mws0064	C15H12O6	Eriodictyol (5,7,3',4'-Tetrahydroxyflavanone)	1.53282	0.616193	up
98	HJAP023	C33H40O21	Kaempferol-6,8-di-C-glucoside-7-O-glucoside	4.28182	2.09822	up
99	Hmdn006855	C30H48O3	3,4-Cycloopen-cycloaltin-4(29),25-diene-24(R)-hydroxy-3-carboxylic acid	0.557826	-0.842113	down
100	Ymjm000152	C12H16O7	p-Hydroxypheny-β-D-allopyranoside	0.553748	-0.852698	down
101	Zmhp002714	C16H12O6	5,6,7-Tetrahydroxy-8-methoxyflavone*	1.44536	0.531429	up
102	MWSmce062	C15H18O3	Xanthatin	0.602031	-0.732091	down
103	HJKP000649	C8H9NO	N-benzylformamide	1.61199	0.68884	up
104	Zmdn005578	C24H22O13	Emodin-8-O-(6'-O-malonyl)-beta-D-glucopyranoside	0.660302	-0.598802	down
105	Jmgn005927	C15H12O6	2-hydroxynaringenin	1.54392	0.626593	up
106	Zmtn001624	C10H7NO3	N-Acetylisatin	1.52306	0.606976	up
107	Lmjp004404	C16H12O8	Quercetagetin-3-Methyl Ether	1.47482	0.560542	up
108	MWSmce502	C15H22O2	Artemisinic acid	1.8133	0.858615	up
109	Jmcp010061	C15H22O2	costic acid	1.8133	0.858615	up
110	HX1312	C13H16O3	Precocene II	1.99939	0.999561	up
111	Wbmp011024	C15H24O	Caryophyllenol II	1.62596	0.701291	up
112	zjbp111643	C15H22O	neopetasane(iso-1)	1.67295	0.742393	up
113	pmp000912	C15H18O3	Hydroxyindesteolide	0.484267	-1.04613	down
114	Lmsp004137	C15H12O6	3,4,2',4',6'-Pentahydroxychalcone	1.93431	0.951822	up
115	pme1738	C7H9N2O	3-Carbamyl-1-methylpyridinium;(1-Methylnicotinamide)	1.86712	0.900812	up
116	mws0051	C16H12O5	Acacetin	0.63044	-0.66557	down
117	mws0906	C16H22O8	Coniferin	2.50563	1.32518	up
118	pmb0813	C10H9NO2	1-Methoxyindole-3-carbaldehyde	1.43598	0.522037	up
119	Wasn003938	C13H16O7	Benzoyl-Beta-D-Glucoside	1.65629	0.727953	up
120	Lsmp010415	C20H32O2	ent-pimara8(14),15-dien-3a,19-diol	1.67471	0.743908	up
121	Cmyp003257	C19H30O8	Icariside B1	0.558014	-0.841626	down
122	Hmcp001919	C30H34O18	Isorhamnetin-3-O-(6''-acetylglucosyl)(1→3)-glucoside	2.1442	1.10044	up
123	Zjyp110102	C15H22O	Nootkatone(iso-1)	1.90907	0.932869	up
124	Cmap003293	C15H16O3	Yomogin	0.494901	-1.01479	down
125	Wcgn012055	C20H30O4	Araucarolone	1.47984	0.565446	up
126	zjzp121502	C15H20O3	eupatorinol(iso-1)	2.05593	1.03979	up
127	mws0459	C10H12O2	Eugenol	1.51746	0.601661	up
128	Jmln005880	C17H14O8	Viscidulin III	1.44943	0.53549	up
129	MWSprf119	C32H50O4	3-acetylursolic acid	1.62229	0.698031	up
130	Layp004060	C18H18O12	5,7-Dihydroxychromone malonyl glucoside	1.80954	0.855623	up
131	mad2394	C24H22O12	Sinapoyl-p-coumaroyltartaric acid	2.13467	1.09401	up
132	Lmdn006025	C15H12O6	2-Hydroxy-2,3-dihydrogenistein	1.48169	0.567243	up
133	pme3200	C2H7N3	1-Methylguanidine	0.639216	-0.645625	down
134	Lmqp002170	C33H40O21	Kaempferol-3-O-sophorotrioside*	4.5314	2.17996	up
135	Lmfn004093	C21H24O10	Phloretin-4'-O-glucoside (Trilobatin)	1.87377	0.905947	up
136	Qmyp101336	C18H28O3	JiangxiBaiyingsu I(ISO2)	1.53872	0.621727	up
137	Qmqp102529	C15H22O4	Artemin	1.56302	0.644336	up
138	Lmyn012274	C30H46O4	3,25-Epoxy-3-hydroxyolean-18-en-28-oic acid (Semimoronic acid)	2.99609	1.58308	up
139	Lmyn011818	C30H44O4	3,19-Epoxy-3,22-dihydroxydammara-20,24-dien-26-oic acid δ-lactone (Semialactone)	3.32451	1.73314	up
140	mws1290	C30H26O13	Kaempferol-3-O-(6''-p-Coumaroyl)glucoside (Tiliroside)	0.648983	-0.623748	down
141	Jmcn007391	C15H22O4	1β,3β-dihydroxy-eudesmane-5,11(13)-dien-12-oic acid	1.81444	0.859528	up
142	Jmcn007456	C15H22O4	2α,3β-dihydroxy pterodontic acid	1.60245	0.680275	up
143	Wagp009074	C18H16O7	Santin	0.626576	-0.674438	down
144	Latp007251	C18H26O3	Normelanothyrsin A	1.82935	0.87133	up
145	mws0908	C16H12O5	Glycitein	0.289886	-1.78644	down
146	Zahp009671	C14H29NO	N-isopropylundecanamide	0.668549	-0.580895	down
147	HJN055	C21H24O10	Dihydrocharcone-4'-O-glucoside	1.70076	0.766178	up
148	pmb0774	C10H12N2O	N-Hydroxytryptamine	0.29052	-1.78329	down
149	MWSmce675	C12H16O7	Arbutin	0.553155	-0.854244	down
150	Lahp008617	C17H17NO	N-2-Phenylethyl-cinnamamide	2.15565	1.10812	up
151	MW0124084	C13H14O3	Eupatoriochromene	0.645953	-0.630498	down
152	pmp000086	C13H16O6	1-Feruloyl-sn-glycerol*	4.71789	2.23814	up
153	pme2268	C7H7NO2	Trigonelline	1.85966	0.895037	up
154	Lmgn002250	C31H34O17	Dicaffeoylquinic acid-O-glucoside	1.96102	0.971602	up
155	Wmzp005304	C25H32ClN5O7	Astin H	1.40415	0.489693	up
156	MWS0434	C19H28O2	Trans-dehydrorosinone	1.56587	0.646965	up
157	MWS20169	C15H10O5	2,5-dihydroxy-1-methoxy-anthraquinone	1.70295	0.768037	up
158	Lmzn006582	C30H46O4	2-Formyl-3-hydroxy-A(1)-norlup-20(29)-en-28-oic acid (Colubrinic acid)	2.05756	1.04093	up
159	MW0168269	C17H22O3	Podocarpa-8,11,13-trien-16-oic acid, 12-hydroxy-	1.49294	0.578154	up
160	Lhhp005648	C10H10O3	Trans-3,4-methylenedioxycinnamyl alcohol	1.54407	0.626737	up
161	Zmhn003257	C16H12O6	5,7,2'-Trhiyroxy-8-methoxyflavone	0.653533	-0.613669	down
162	Zamn006847	C12H20O4	glycoric acid	1.65135	0.723649	up
163	mws0179	C17H20O9	Chlorogenic acid methyl ester	4.99521	2.32055	up
164	mws0918	C16H12O5	Prunetin (5,4'-Dihydroxy-7-methoxyisoflavone)	0.653354	-0.614063	down
165	Lmyn000160	C8H14O8	Mucic acid Dimethyl Ester	3.24656	1.69891	up
166	HX1313	C20H28O3	3-Methylbutyryloxyeuryopsin	1.44366	0.529726	up
167	mws0178	C16H18O9	Chlorogenic acid (3-O-Caffeoylquinic acid)*	2.64234	1.40136	up
168	Lman002731	C15H18O9	Grevilloside F	2.36827	1.24383	up
169	pmb3014	C31H30O15	Luteolin-7-O-(6''-eudesmyl)glucoside	0.641702	-0.640024	down
170	Jmcn005419	C21H36O7	pterodontoside G	2.83421	1.50295	up
171	Lmln001195	C14H18O7	Picein (4-Acetylphenyl-glucoside)	0.541533	-0.884879	down
172	pmp000249	C12H14O3	Senkyunolide F	1.63742	0.711427	up
173	zjhp113008	C20H24O6	Euponin	1.65742	0.728941	up
174	MWSmce466	C8H8O2	4-Hydroxyacetophenone	0.379948	-1.39613	down
175	mws1292	C26H28O14	Isoschaftoside	1.4018	0.487279	up
176	pme3083	C8H7NO3	2-(Formylamino)benzoic acid	4.14693	2.05204	up
177	Lmbp002962	C10H8O5	Isofraxetin	1.73224	0.792636	up
178	Zajp002650	C27H30O15	Vitexin-7-O-glucoside	1.48767	0.573054	up
179	pmp000436	C30H50O	13-Methyl-27-norolean-14-en-3-ol (Taraxerol)	4.01067	2.00384	up
180	MWSHY0096	C19H18O8	Chrysosplenetin (5,4'-Dihydroxy-3,6,7,3'-tetramethoxyflavone)	1.41989	0.505781	up
181	pmb0608	C25H24O14	Chrysoeriol-7-O-(6''-malonyl)glucoside	1.43118	0.517206	up
182	mws1179	C21H22O10	Naringenin-7-O-glucoside (Prunin)*	1.95791	0.969318	up
183	Hmgp002189	C22H22O11	Hispidulin-7-O-glucoside(Homoplantaginin)	1.48945	0.574776	up
184	Smpn011792	C30H48O4	2,3-Dihydroxy-12-ursen-28-oic acid	1.43223	0.51826	up
185	Lmzp002365	C22H24O11	Hesperetin-7-O-glucoside	1.41962	0.505509	up
186	pmb0645	C28H34O16	Hesperetin-6-C-glucoside-7-O-glucoside	1.4033	0.488822	up
187	Lakn004098	C15H22O5	Dihydrophaseic Acid	0.691657	-0.531872	down
188	Hmln000659	C13H16O10	3-O-Galloyl-D-glucose*	1.94705	0.96129	up
189	Zmsn002115	C21H32O8	Sonchuside A	0.70016	-0.514242	down
190	Qmqp102515	C15H18O3	Leucodin	1.52961	0.613168	up
191	Smgp006258	C30H26O13	6,7,3',4'-Tetrahydroxyaurone-6-O-(6''-O-p-Coumaroyl)glucoside	3.50808	1.81068	up
192	zjgp122013	C21H20O11	(Z)-6-O-β-D-glucopranosyl-6,7,3',4'-tetrahydroxyaurone	1.40528	0.490862	up
193	pmp000970	C20H30O3	Hispanolone	1.41009	0.49579	up
194	Hmlp005624	C16H12O5	3',7-dihydroxy-4'-methoxyflavone	0.628911	-0.669073	down
195	mws0711	C6H6N2O2	Nicotinamide-N-oxide	2.52286	1.33506	up
196	pmb0628	C27H32O16	Eriodictyol-8-C-glucoside-4'-O-glucoside	1.56088	0.642357	up
197	Latp006450	C15H18O2	Spirovirgafuran	1.7503	0.807604	up
198	Qmqp101711	C11H12O3	Trans-p-hydroxycinnamic acid ethyl ester	0.44816	-1.15792	down
199	Hmtn001358	C14H17NO7	2-(D-Glucosyloxy)-4-hydroxybenzeneacetonitrile	0.535464	-0.901139	down
200	pmb3074	C16H18O8	5-O-p-Coumaroylquinic acid*	3.52328	1.81692	up
201	Lmmn001643	C9H8O3	2-Hydroxycinnamic acid*	0.42487	-1.23491	down
202	pmn001371	C27H34O12	Eucommin A	1.75197	0.808979	up
203	pmb3068	C16H18O8	1-O-p-Coumaroylquinic acid	2.61836	1.38866	up
204	Lamp003722	C30H32O18	Apigenin glucosyl malonyl glucoside	2.12145	1.08505	up
205	Lmyp004318	C30H26O13	Kaempferol-3-O-(6''-p-Coumaroyl)galactoside*	3.86441	1.95025	up
206	Lmfp005436	C27H22O15	Quercetin-3-O-(2''-O-galloyl)Arabinoside	0.211188	-2.2434	down
207	Zmhp003784	C27H30O17	Rhodioflavonoside	1.4286	0.514601	up
208	mws0044	C15H12O7	Taxifolin(Dihydroquercetin)	115700	16.82	up
209	Zmhn002269	C11H10O6S	2,5-Dimethylchromone-7-O-sulfate	0.0459999	-4.44223	down
210	Latp006670	C15H20O3	Telekin	2.04595	1.03277	up
211	Qmyp101233	C13H20O3	Blumenol A(ISO)	1.87263	0.905069	up
212	Lsmp010418	C13H22O3	Corchoionol A	1.59466	0.673251	up
213	pme2693	C6H14N2O	N-Acetylputrescine	2.22466	1.15358	up
214	mws2212	C9H8O4	Caffeic acid	0.575513	-0.797079	down
215	Lmcp003522	C12H10O4	Baldrinal	1.40529	0.490865	up
216	Ymjm000148	C14H20O7	Salidroside	2.01509	1.01084	up
217	MWS1888	C12H16O6	Phenyl-beta-D-glucoside	1.89157	0.919581	up
218	pmp000011	C20H28O6	Argyinolide H	2.02163	1.01552	up
219	Lssp210438	C16H12O6	3'-O-methylorobol(ISO1)	1.51771	0.601892	up
220	MWS1743	C15H20O	alpha-hexylcinnamaldehyde	2.57364	1.36381	up
221	Hmgp003163	C17H14O8	3,3',5,7-Tetrahydroxy-4',6-Dimethoxyflavone; (Laciniatin)	1.40663	0.492239	up
222	MWSmce025	C16H18O10	Fraxetin-8-O-glucoside (Fraxin)	7.17857	2.8437	up
223	Lmbn005172	C9H10O3	2,6-Dimethoxybenzaldehyde	0.677788	-0.561094	down
224	pmb3041	C23H22O14	Tricin-7-O-saccharic acid	0.708562	-0.497034	down
225	Hmsn002272	C15H20O8	Demethyl coniferin	1.59299	0.671742	up
226	Hmsn001911	C13H18O8	Idesin	0.633468	-0.658656	down
227	mws0943	C7H8N2O2	1,4-Dihydro-1-Methyl-4-oxo-3-pyridinecarboxamide	2.09083	1.06408	up
228	Zjxp110316	C15H22O4	2β,3α-Dihydroxycostic acid*	1.65586	0.727582	up
229	Hmlp003068	C27H30O17	Meratin	1.84818	0.886102	up
230	Lmqn004838	C15H8O8	3-O-Methylellagic acid	0.372621	-1.42422	down
231	Lman002117	C15H18O9	Grevilloside Q	5.11572	2.35494	up
232	pmn001421	C16H18O8	3-O-p-Coumaroylquinic acid*	2.55406	1.35279	up
233	Wafn003429	C16H30O10	3-Methylbutyl 6-O-(alpha-L-arabinopyranosyl)-beta-D-glucopyranoside	0.41873	-1.25591	down
234	Zmdn004052	C21H20O10	Aloe emodin-1-O-glucoside	3.41993	1.77397	up
235	pme1841	C5H14N2	Cadaverine	2.49414	1.31854	up
236	Wbsp000203	C31H52O5	3-O-acetyltohogenol	3.27972	1.71357	up
237	MW0136833	C15H10O4	7,3'-Dihydroxyflavone	1.49908	0.584078	up
238	Lmsn012627	C30H46O4	2,3-Dihydroxyurs-12,18-dien-28-oic acid*	1.75684	0.812981	up
239	Lmdp004307	C23H26O10	Farrerol-7-O-glucoside	1.40746	0.493092	up
240	Wchn003984	C16H18O8	Alpha-Hydrojuglone 4-Glucoside	2.60875	1.38336	up
241	Smmp010394	C17H22O4	Epitulipinolide	0.677609	-0.561474	down
242	HJN086	C21H22O11	Eriodictyol-3'-O-glucoside	1.73417	0.794244	up
243	Lahp002664	C33H40O21	Kaempferol triglucoside*	3.59905	1.84761	up
244	Lmgn002679	C6H6O	Phenol	1.65874	0.730087	up
245	Lazn002843	C34H42O21	Chrysoeriol triglucoside	1.93269	0.950613	up
246	Wayp004564	C9H11NO3	4-hydroxy-4-(3-pyridyl)-butanoic acid	0.656662	-0.606777	down
247	Zbjn005476	C34H30O15	1,3,4-Tri-O-Caffeoyl Quinic Acid	1.42404	0.509993	up
248	mws1015	C15H16O9	Esculin (6,7-Dihydroxycoumarin-6-O-glucoside)*	1.5214	0.605402	up
249	Lmgn002933	C18H18O7	5,7-Dihydroxy-2',3',4'-trimethoxydihydroisoflavone	1.45861	0.544598	up
250	Lmfn000604	C13H16O10	6-O-Galloyl-β-D-glucose*	1.85139	0.888605	up
251	Lmbp102601	C9H6O3	7-Hydroxycoumarin;Umbelliferone	2.58304	1.36907	up
252	Cmhp005227	C16H18O8	4,8-Dihydroxy Naphthol-1-O-glucoside	3.90064	1.96371	up
253	Smcp000882	C15H21NO7	N-benzoyl-2-aminoethyl-β-D-glucopyranoside	0.685075	-0.545667	down
254	Jmzn006005	C10H10O3	3,4-Methylenedioxy cinnamyl alcohol	1.67181	0.74141	up
255	pmb3045	C23H22O13	Tricin-7-O-Glucuronide	1.53494	0.618179	up
256	Hmmp003875	C8H5NO2	Isatin	0.628248	-0.670593	down
257	Qmyp122014	C15H20O3	Pterodnic acid(ISO1)	1.56029	0.641811	up
258	MA10107783	C10H8O5	3-[(1-Carboxyvinyl)oxy]benzoic acid	0.692172	-0.530798	down
259	MWSmce041	C12H14O2	Butylphthalide	1.4857	0.571146	up
260	MWSmce248	C9H8O3	3-Hydroxycinnamic Acid*	5.74628	2.52263	up
261	Zmgp003335	C27H32O16	Okanin-3',4'-di-O-glucoside*	1.60919	0.686334	up
262	Zbln001290	C14H20O9	β-Hydroxy-(3,4-dihydroxyphenylethanolyl)-glucoside	1.94712	0.961344	up
263	pmb0772	C19H18N2O2	N-Cinnamoylserotonin	0.409853	-1.28682	down
264	Hmdn006566	C30H48O3	3,4-Open loop-lupine-4(23),20(29)-diene-24-hydroxy-3-carboxylic acid	0.556714	-0.844992	down
265	pmb2654	C19H27NO12	Anthranilate-1-O-Sophoroside	2.9517	1.56155	up
266	Cmsp003083	C26H32O11	Dehydrodiconiferyl alcohol-4-O-glucoside*	1.83759	0.877815	up
267	Qmdp112404	C22H36O3	Viteagnusin B	1.42614	0.512118	up
268	Wagp009430	C18H19NO2	N-(4-methoxyphenethyl)cinnamamide	2.16935	1.11726	up
269	Lafp005308	C15H16O3	Encelin	98144.9	16.5826	up
270	mws0048	C21H20O10	Apigenin-8-C-Glucoside (Vitexin)	0.637291	-0.649976	down
271	Lmzn001894	C21H18O12	Kaempferol-3-O-glucuronide	1.41749	0.503343	up
272	Lmbn001162	C15H16O9	Esculetin-7-O-glucoside*	1.44912	0.535179	up
273	pmb0130	C12H14N2O	Acetryptine	0.461071	-1.11694	down
274	Zmsn002206	C16H24O10	Cornusoside A	2.27604	1.18652	up
275	MWSslk002	C21H20O10	Sophoricoside	1.4119	0.497635	up
276	Zmhn001036	C21H22O10	Choerospondin	4.46897	2.15994	up
277	pme3233	C16H12O5	Calycosin	1.52152	0.605514	up
278	MWSslk252	C28H34O14	Didymin (Isosakuranetin-7-O-rutinoside)*	0.671005	-0.575605	down
279	Lmhp003162	C34H42O21	Chrysoeriol-6,8-di-C-glucoside-4'-O-glucoside*	2.53064	1.3395	up
280	pmb2936	C28H32O14	Disinapoyl glucoside	0.619094	-0.691771	down
281	pmb0618	C28H34O16	Hesperetin-8-C-glucoside-3'-O-glucoside	1.77707	0.829501	up
282	zjgp122310	C13H8O	Trideca-2,12-diene-4,6,8,10-tetrayne-1-diol	0.713849	-0.486309	down
283	Zmxn110201	C14H20O9	2,6-Dimethoxy-4-hydroxyphenol-1-O-ß-D-glucopyranoside	0.577001	-0.793354	down
284	pmp000087	C13H16O6	2-Feruloyl-sn-glycerol*	4.92349	2.29968	up
285	pma6460	C16H18O8	4-O-p-Coumaroylquinic acid	2.65474	1.40857	up
286	Hmln002355	C27H34O12	5'-Methoxymatairesinoside	1.67079	0.740529	up
287	MWS20152	C22H26O8	Syringaresinol	1.51768	0.601867	up
288	Lmhn003240	C11H10O6	Benzoylmalic acid	1.65945	0.730706	up
289	HJAP026	C28H32O16	Chrysoeriol-6-C-glucoside-4'-O-glucoside	1.68272	0.750796	up
290	pmb2979	C25H26O14	Hesperetin-7-O-(6''-malonyl)glucoside	1.62543	0.70082	up
291	Lmyn003028	C19H28O11	Benzyl-β-gentiobioside*	3.71966	1.89517	up
292	Zmpn002553	C15H16O9	Cichoriin*	1.44079	0.526859	up
293	Smcn000644	C14H20O9	Leonuriside A	0.561096	-0.83368	down
294	Li512111	C24H24O13	Isorhamnetin-3-O-(6''-acetylglucoside)	0.377245	-1.40643	down
295	Lcgn000234	C15H16O9	davidioside C	1.43687	0.522928	up
296	Zmcn005156	C26H26O12	4,5-O-Dicaffeoylquinic Acid Methyl Ester	5.19898	2.37823	up
297	pmn001704	C30H46O4	2,3-Dihydroxy-5(6),12(13)-diene-ursolic acid*	1.75905	0.814795	up
298	Hmcp003285	C15H20O3	Santamarin	2.4727	1.30609	up
299	Zmtp009051	C14H16O2	Liguhodgsonal	2.26856	1.18178	up
300	pmp001105	C33H40O20	Kaempferol-3-O-neohesperidoside-7-O-glucoside*	1.53039	0.613902	up
301	Lmsp003161	C33H40O20	Kaempferol-3-O-sophoroside-7-O-rhamnoside*	1.53039	0.613902	up
302	Hmhn002787	C21H32O10	(1'R,3R,5R,8'S)-Dihydrophaseic acid-O-β-D-glucoside	0.704305	-0.505728	down
303	pmp001244	C14H20NO4+	Caffeoylcholine	0.406556	-1.29847	down
304	Lmjn004991	C15H24O5	Dihydro Artemisinin-D3	1.43585	0.521904	up
305	MW0135136	C15H10O6	6,7,3',4'-Tetrahydroxyflavone	1.43352	0.519564	up
306	Smsp110188	C15H22O2	isopolygodial	1.72042	0.782758	up
307	pmp000906	C15H16O	Dihydroylindesteolene	0.606791	-0.720729	down
308	HX1360	C10H8O3	7-methoxycoumarin	4.84186	2.27556	up
309	Lmmn004912	C16H12O7	3-O-Methylquercetin	1.48141	0.566968	up
310	pme2598	C8H8O4	3,4-Dihydroxybenzeneacetic acid	1.42483	0.510787	up
311	pmn001644	C23H20O14	Quercetin-3-O-(2''-O-acetyl)glucuronide	0.365787	-1.45093	down
312	Lmyp002204	C21H22O11	Hovertichoside C	2.81874	1.49505	up
313	Wasn006251	C20H20O10	Shomaside F	3.29556	1.72052	up
314	Cmxp003531	C27H32O16	Okanin-4'-O-gentiobioside*	1.55146	0.633631	up
315	Wafn002807	C24H24O13	methyl 4-O-galloylchlorogenate	1.63665	0.710748	up
316	MWSmce694	C3H6N2	3-Aminopropionitrile	1.90628	0.930762	up
317	mws0885	C7H6O4	2,4-Dihydroxybenzoic acid	2.10968	1.07703	up
318	pme2987	C9H8O2	3,4-Dihydrocoumarin	1.83739	0.877655	up
319	pmn001378	C26H32O11	Pinoresinol-4-O-glucoside	1.57031	0.65105	up
320	Hmmp002121	C23H16O11	Isorhamnetin-3-O-gallate	0.681113	-0.554035	down
321	Wafn002874	C22H28O14	4-O-(4'-O-alpha-D-Glucopyranosyl)caffeoylquinic acid	2.06153	1.04371	up
322	Wbmn00859	C20H16O8	vitelignin A	3.19627	1.67639	up
323	Smjp002687	C21H28O10	cichorioside B	1.86437	0.898686	up
324	Lmjp003822	C26H26O12	3,5-O-Dicaffeoylquinic Acid Methyl Ester*	3.8292	1.93704	up
325	pmb0639	C33H40O20	Apigenin-8-C-glucoside-7-O-Sophoroside	5.78264	2.53173	up
326	zjhp113017	C20H22O7	Eupachinilide G(iso-1)	1.96263	0.972791	up
327	HJN106	C30H46O5	2-Carboxy-3-hydroxy-A(1)-norlupan-20(29)-en-28-oic acid (Ceanothic acid)	3.69527	1.88568	up
328	mws1631	C15H18O3	Santonin	0.369069	-1.43804	down
329	pmb0620	C34H42O21	Chrysoeriol-6,8-di-C-glucoside-7-O-glucoside*	2.41071	1.26946	up
330	Lhfp110831	C19H26O4	6β-Isobutyryloxy-9-oxo-10αH-furanoeremophilane(iso-04)	1.71893	0.781514	up
331	Lhmp122023	C19H20O12	3-O-caffeoyl malonyl quinic acid	1.67811	0.74684	up
332	Lmsn008908	C30H48O7	2,3,19,23,24-Pentahydroxyolean-12-en-28-oic acid	1.41897	0.504845	up
333	Yajn002315	C22H28O14	4-O-(3'-O-alpha-D-Glucopyranosyl)caffeoylquinic acid	3.36383	1.75011	up
334	Zmjp003597	C19H32O8	Ampelopsisionoside	1.43357	0.519615	up
335	Zmhn000593	C35H46O20	Magnoloside B	3.02649	1.59764	up
336	pmp000005	C20H22O5	Moxartenolide	2.23801	1.16222	up
337	Wasn006584	C20H20O11	1-Galloyl-6-O-Benzoyl Glucose	2.0477	1.034	up
338	Lmcp004624	C16H12O6	3-Methylkaempferol	1.61061	0.687612	up
339	Layp002880	C15H16O9	5,7-Dihydroxychromone glucoside	1.4172	0.50304	up
340	zjhp113010	C20H24O6	Eupachinilide B(iso-1)	0.315324	-1.6651	down
341	MW0014451	C19H28O2	4-Dihydroboldenone	1.56684	0.647855	up
342	Wbjp002336	C16H18N2O5	N,N-diethyl-5-hydroxytryptamineoxalate	1.46638	0.552254	up
343	pmp000284	C11H10O5	Fraxidin (8-Hydroxy-6,7-dimethoxycoumarin)	2.23499	1.16027	up
344	Hmdn001667	C20H16O13	Ellagic acid-4-O-glucoside	1.77579	0.828463	up
345	mws0018	C10H26N4	Spermine	0.62683	-0.673853	down
346	Lmtn002324	C19H28O11	Benzyl-(2''-O-glucosyl)glucoside*	3.59843	1.84737	up
347	Li512114	C31H50O4	2,3-Dihydroxyurs-12-en-28-oic acid methyl ester (Corosolic acid methyl ester)	2.42634	1.27878	up
348	Cmjp002260	C21H26O9	Crepidiaside A	0.694419	-0.526121	down
349	Lafp003256	C11H14O5	3,4'-Dihydroxy-3',5'-dimethoxypropiophenone	0.493972	-1.0175	down
350	Lmhn004756	C23H20O10	Cinnamoylferuloyltartaric acid	2.20098	1.13814	up
351	pmb0382	C19H14O6	O-Feruloyl 4-hydroxycoumarin	1.68726	0.754683	up
352	Hmln003405	C20H16O12	Ellagic acid-4-O-rhamnoside	0.441108	-1.1808	down
353	MWS1852	C8H8O2	4-Methoxybenzaldehyde	1.48436	0.569844	up
354	Zblp002750	C10H12O3	Methyl-3-(3-hydroxyphenyl)Propionate	1.59711	0.675468	up
355	MWSmce264	C8H10O3	Hydroxytyrosol	3.36547	1.75081	up
356	Lmdp003509	C20H18O11	Quercetin-3-O-xyloside (Reynoutrin)*	0.425012	-1.23443	down
357	Hmpn005101	C21H24O11	Sieboldin	1.5846	0.664118	up
358	pme3443	C11H12O4	Sinapinaldehyde	1.51095	0.595453	up
359	pmp001290	C27H26O17	Apigenin-7-O-(2''-glucurosyl)glucuronide	0.692619	-0.529865	down
360	Jmcn005986	C21H32O8	pterodontoside A*	1.59359	0.672284	up
361	Hmpp103270	C21H20O12	Eriodictyol-7-O-glucoronide	1.58247	0.662179	up
362	Lmmn002131	C22H22O11	3'-Methoxyorobol-7-O-glucoside	1.4651	0.550998	up
363	Jmwn002172	C14H20O8	3,4-dihydroxyphenylethanol-β-D-glucopyranoside	1.8765	0.908048	up
364	Lmdn003699	C24H30O12	6-O-Trans-Caffeoyl Ajugol	0.594759	-0.749624	down
365	Lmsn002815	C27H30O15	Kaempferol-3-O-rutinoside(Nicotiflorin)	2.88311	1.52762	up
366	MWSmce558	C19H20O6	Diosbulbin B	1.47256	0.558326	up
367	Qmqp102524	C15H18O5	Tanaphillin	1.41648	0.502314	up
368	MWSslk146	C27H30O15	4'-O-Glucosylvitexin	3.19635	1.67643	up
369	Hahn002315	C28H36O13	syringaresinol-4-O-β-D-glucopyranoside	0.685556	-0.544653	down
370	Zmxp003107	C27H30O16	Luteolin-7,3'-di-O-glucoside*	1.54861	0.630975	up
371	Zmgp002917	C27H32O16	Okanin-4'-O-glucosyl-O-glucoside*	1.7285	0.78952	up
372	Lmtp002642	C26H28O14	Apigenin-8-C-(2''-glucosyl)arabinoside	1.52794	0.611585	up
373	MWSmce221	C10H8O4	5,7-Dihydroxy-4-methylcoumarin	1.70085	0.766257	up
374	Lmtp003569	C8H9NO2	(R)-Mandelamide	0.442983	-1.17468	down
375	Wmzn006169	C30H48O4	3,16-Dihydroxyolean-12-en-28-oic acid (Echinocystic acid)	1.59174	0.670603	up
376	mws1584	C25H24O12	1,3-O-Dicaffeoylquinic Acid (Cynarin)	0.394392	-1.3423	down
377	Cmap003902	C35H40O8	Arteminolide D	1.7542	0.810816	up
378	MWS1839	C9H10O3	Ethylparaben	0.588066	-0.765949	down
379	pme1292	C8H8O4	Homogentisic acid	1.60193	0.679815	up
380	Wmzn002116	C25H24O12	3,5-Dicaffeoylquinic acid	0.425026	-1.23438	down
381	Wajp004095	C27H30O15	Apigenin-7-O-Gentiobioside	2.91639	1.54419	up
382	Wmzn000627	C22H36O4	Ajugalaevigatic acid	0.447108	-1.16131	down
383	Lmsn000363	C16H22O7	Raspberryketone glucoside	1.40968	0.495368	up
384	Hmcp002539	C22H22O11	Isorhamnetin-3-O-rhamnoside	0.406018	-1.30038	down
385	Waxn004217	C31H34O17	1,5-O-dicaffeoyl-3-O-glucoside-quinic acid*	1.43437	0.52042	up
386	mws1521	C13H18O7	Salicin	1.8728	0.905193	up
387	Zmcp002666	C27H30O17	Quercetin-3,7-Di-O-glucoside	1.75312	0.809924	up
388	Qmqp101743	C36H42O11	Sarcandrolide B	1.72114	0.783364	up
389	pma0692	C25H31N3O4	N1,N10-Bis(p-coumaroyl)spermidine	2.02906	1.02081	up
390	Lacp003788	C17H20O9	Amurenlaetone A	4.21593	2.07585	up
391	Hmgn001278	C20H30O12	Verbasoside	2.59395	1.37515	up
392	Lmqp008286	C30H48O5	2,3,23-Trihydroxyolean-12-en-28-oic acid (Arjunolic acid)	1.48891	0.574258	up
393	pmp000014	C35H40O8	Arteminolide B	1.81364	0.858885	up
394	pmn001637	C20H18O10	Kaempferol-3-O-arabinoside (Juglanin)	1.56881	0.649671	up
395	pmb0706	C30H32O20	Quercetin-3-O-(6''-O-malonyl)glucosyl-5-O-glucoside	1.80183	0.84946	up
396	Zmsn002575	C17H24O11	Hastatoside	0.568958	-0.813606	down
397	pmb0631	C26H28O15	Orientin-6-C-arabinoside	1.58585	0.665258	up
398	Hmln001682	C29H32O18	Quercetin-3-O-(6''-O-acetyl)glucosyl-(1→3)-Galactoside	1.83345	0.874563	up
399	Zjxp110315	C15H22O4	2β,5α-Dihydroxyisocostic acid*	1.82903	0.871079	up
400	Zmhn002334	C16H20O9	6-O-Feruloyl-β-D-glucose	0.681993	-0.552172	down
401	Qmdp112410	C21H36O3	Vitetrifolin H	2.45486	1.29564	up
402	pmn001511	C13H18O7	3-Hydroxy-5-Methylphenol-1-O-Glucoside	1.72262	0.784603	up
403	pmb0578	C32H30O15	Luteolin-7-O-(6''-sinapoyl)glucoside	0.523572	-0.933541	down
404	MW0169339	C20H30O3	Isosteviol	2.88316	1.52765	up
405	pmp001311	C27H30O17	6-Hydroxykaempferol-7,6-O-Diglucoside	1.93617	0.953204	up
406	Lmjp006533	C18H16O7	4',5-Dihydroxy-3,3',7-Trimethoxyflavone; Pachypodol*	0.649519	-0.622557	down
407	pmn001525	C23H26O11	3,5-Digalloylshikimic acid	1.73607	0.795823	up
408	Lmmp000897	C30H26O14	Gallocatechin-(4α→8)-gallocatechin	1.94241	0.957845	up
409	Lszp210010	C15H20N2O6	Tatarine	2.26334	1.17846	up
410	Lmhn002683	C22H18O11	p-Coumaroylcaffeoyltartaric acid	1.61129	0.688215	up
411	Lmwp003442	C21H20O11	Amoenin	1.96405	0.973835	up
412	Hmgp002950	C25H33N3O6	N1-Caffeoyl-N10-dihydrocaffeoylspermidine	0.707901	-0.498381	down
413	Cmxn004016	C21H24O11	Dihydromarein	1.65687	0.728462	up
414	Lakp003279	C30H32O21	Malonyl glucosyl myricetin glucoside	4.92686	2.30067	up
415	pmb0752	C17H20O9	3-O-Feruloylquinic acid	4.11526	2.04098	up
416	pmp001312	C33H40O22	6-Hydroxykaempferol-3,7,6-O-triglycoside	2.05145	1.03665	up
417	pma3724	C17H20O9	1-O-Feruloylquinic acid	2.98875	1.57954	up
418	Lhmp121005	C26H32O11	Symplocosin(iso-01)	1.77732	0.829703	up
419	Lmzn001925	C12H16O5	3,4'-Dihydroxy-3'-methoxybenzenepentanoic acid	1.68022	0.748652	up
420	Zbdn001947	C13H18O8	Isotachioside*	0.370984	-1.43057	down
421	Hmqn000843	C13H18O8	Tachioside*	2.05538	1.03941	up
422	MWSHY0128	C19H18O6	5,7,8,4'-Tetramethoxyflavone	1.84384	0.882716	up
423	Hmjp003008	C27H28O16	Luteolin-7-O-glucuronide-5-O-rhamnoside	0.635069	-0.655015	down
424	Lssp210280	C19H18O11	1,5-dihydroxy ketone-6 murine O-β-D-glucoside	0.672229	-0.572976	down
425	Hmlp002975	C28H30O17	Isorhamnetin-3-O-glucuronide-7-O-rhamnoside	0.616528	-0.697761	down
426	Lmtp002822	C25H26O13	Apigenin-6-C-arabinoside-8-C-xyloside*	2.05116	1.03644	up
427	Lmjp003731	C26H26O12	3,4-O-Dicaffeoylquinic Acid Methyl Ester*	2.46139	1.29947	up
428	MWS20178	C11H10O5	isofraxidin	3.42512	1.77616	up
429	Lhkp101525	C20H24O12	Apiosylskimmin	1.77432	0.827269	up
430	Zbrp003982	C21H20O10	Sulfurein; Sulfuretin-6-O-glucoside	2.87211	1.52211	up
431	Lmln001951	C26H28O16	Quercetin-3-O-(6''-O-arabinosyl)glucoside	0.539564	-0.890134	down
432	Hmqp006656	C21H34O3	12-Hydroxyhydromethylabietate	1.94441	0.959333	up
433	Lmtp002942	C25H26O13	Apigenin-6,8-di-C-arabinoside*	1.84547	0.883989	up
434	Lmyp003500	C28H24O15	Kaempferol-3-O-(2''-galloyl)galactoside*	1.98065	0.985977	up
435	Lmyp003348	C28H24O15	Kaempferol-3-O-(6''-galloyl)galactoside*	1.98065	0.985977	up
436	MW0114048	C22H26O12	Catalposide	0.504823	-0.986152	down
437	Lmsn004321	C22H22O13	1-O-Caffeoyl-3-O-galloyl-β-D-glucose	2.01427	1.01026	up
438	Hmap001882	C39H50O26	Kaempferol-3-O-sophorotrioside-7-O-glucoside	5.3575	2.42156	up
439	Wayn002532	C12H14O9	Gallic acid-1-O-xyloside	2.38391	1.25333	up
440	Lafp004481	C15H18O3	4(15)-Dihydroencelin	0.577201	-0.792853	down
441	Zmhp002431	C27H30O15	saffloquinoside A	3.06889	1.61772	up
442	Zmjp003031	C27H30O16	Orientin-2''-O-galactoside	2.25405	1.17252	up
443	mws4108	C21H20O5	1-Methoxyphaseollin	0.402779	-1.31194	down
444	Lmyn001269	C27H30O16	Kaempferol-3-O-sophoroside	1.78496	0.83589	up
445	Wmzp003846	C25H32ClN5O8	Astin L	0.420505	-1.2498	down
446	Wasn002449	C19H26O13	Protocatechuic acid 1-O-Rutinoside	2.12627	1.08832	up
447	Lmmp006709	C30H26O12	Kaempferol-3-O-(4''-p-coumaroyl)rhamnoside	2.00231	1.00166	up
448	Zmjp003291	C27H30O15	Vitexin-2''-O-galactoside	2.68899	1.42707	up
449	Zbzp003763	C10H8O3	11-methoxy viburtinal	4.02207	2.00794	up
450	Lajp003585	C17H20O9	Murrayacarpin A glucoside	5.78822	2.53312	up
451	Hmcp001629	C30H32O19	Kaempferol-3-O-(6''-Malonyl)glucoside-7-O-Glucoside	3.3272	1.73431	up
452	Zbjn003605	C31H34O17	1,4-O-di-Caffeoyl-3-O-glucoside Quinic Acid*	1.41423	0.500018	up
453	mws0025	C6H6O3	Pyrogallol	1.54266	0.625422	up
454	Lmmp005125	C16H14O4	Pinostrobin Chalcone	0.397824	-1.3298	down
455	Lmfn004235	C18H16O8	Myricetin-3,7,3'-trimethyl ether	1.68272	0.750799	up
456	mws0612	C10H12O4	3,4-Dimethoxyphenyl acetic acid	1.99047	0.993106	up
457	Hmcp001618	C32H38O20	Quercetin-3-O-(2''-O-Xylosyl)rutinoside	1.6092	0.686342	up
458	Cmjp004550	C17H26O10	Loganin	3.80589	1.92823	up
459	Lmjp002764	C11H10O5	Umckalin (7-hydroxy-5,6-dimethoxycoumarin)	12.9339	3.69309	up
460	Walp003622	C15H17NO8	6-beta-d-glucopyranosyloxyindole-3-carboxylic acid	0.000153318	-12.6712	down
461	Latp003285	C17H20O8	2,5-Dimethyl-7-hydroxychromone glucoside	5.53746	2.46922	up
462	MWSHY0151	C15H10O8	Quercetagetin; 3,3',4',5,6,7-Hexahydroxyflavone	1.84706	0.885227	up
463	HX1340	C11H16O3	epiloliolide	2.0229	1.01643	up
464	Jmwn002057	C20H30O13	2-(3-β-D-glucopyranosyloxy-4-hydroxyphenyl)ethanol-1-O-β-D-glucopyranoside	4.02818	2.01013	up
465	HJAP064	C25H24O15	Isorhamnetin-3-O-(6''-malonyl)glucoside	0.338696	-1.56194	down
466	pmb0636	C26H28O15	Orientin-7-O-arabinoside	3.86266	1.9496	up
4FF vs 8FF
	Index	Formula	Compounds	Fold_Change	Log2FC	Type
1	Zmwp007375	C15H18O2	Dehydrocostuslactone	0.531175	-0.912741	down
2	MW0113918	C13H17NO	alpha-Pyrrolidinopropiophenone	0.589522	-0.762382	down
3	Lmcp007655	C15H20O2	Atractylenolide Ⅱ	1.62302	0.698683	up
4	mws0102	C9H7NO2	Indole-5-carboxylic acid*	0.458663	-1.12449	down
5	MWS2032	C7H8N2O	6-Methylnicotinamide	0.582087	-0.780694	down
6	Wagp001741	C19H28N2O9	N-(gamma-L-glutamyl)tyramine O-glucoside	2.07363	1.05216	up
7	Latp007327	C15H20O3	Carpesia lactone	0.635052	-0.655054	down
8	zjbp111621	C15H20O2	12,15-dioxo-α-selinen	1.5614	0.642837	up
9	Lwhp010633	C10H9NO	Echinopsine	0.5668	-0.819088	down
10	Lthp012019	C20H26O4	Diaspanolide B	0.545496	-0.874358	down
11	pme3459	C20H28O3	Cafestol	1.40661	0.492218	up
12	Zmhn003059	C16H12O5	Emodin-1-methyl ether	0.650504	-0.620369	down
13	Zaxn005652	C20H28O3	Pisiferic acid	0.580171	-0.785449	down
14	Zaxn005783	C21H32O2	Methyl neoabietate	0.580171	-0.785449	down
15	MWSCX005	C15H20O2	selina-4,11-diene-12,15-dial	1.47959	0.565196	up
16	Wahp005790	C34H37N3O7	Di-p-coumaroylcaffeoyl Spermidine	0.421798	-1.24538	down
17	Zahp009603	C19H23NO3	(1E,4E)-1-(2-methoxy-3,4-dimethyl-2,3-dihydro-1H-pyrrol-1-yl)-5-(3-methoxyphenyl)penta-1,4-dien-3-one	0.585755	-0.77163	down
18	pmp000017	C12H12O2	Butylidenephthalide	0.555262	-0.84876	down
19	Zahp011639	C16H29NO	Dodecadienoic acid isobutylamide	0.602494	-0.730982	down
20	Zmsp002551	C21H30O9	Ixerin D	1.62098	0.696869	up
21	Wayn001856	C13H16O11S	4-Hydroxybenzoic acid 4-(6-O-sulfo)glucopyranoside	2.38052	1.25128	up
22	Lthp012010	C15H18O3	Zaluzanin C	0.539832	-0.889417	down
23	MWS2076	C6H7NO	2-Aminophenol	0.589572	-0.762259	down
24	pmp000344	C15H10O5	3',4',7-Trihydroxyflavone	0.686305	-0.543078	down
25	Lahp002608	C11H9NO2	3,5-Dihydro-2H-Furo[3,2-C]Quinolin-4-One	0.372788	-1.42357	down
26	MWS0687	C7H8N2O2	1-Methyl-6-Oxo-1,6-Dihydropyridine-3-Carboxamide	0.662631	-0.593723	down
27	pmp000243	C12H12O2	E-Butylphthalide	0.532832	-0.908247	down
28	MW0129513	C16H16O4	1-(2,6-Dihydroxy-4-methoxyphenyl)-3-phenyl-1-propanone	0.650466	-0.620455	down
29	mws1500	C11H12O2	Ethyl cinnamate	0.564906	-0.823918	down
30	Lmrn003000	C9H10O3	2-Hydroxy-3-phenylpropanoic acid	0.460646	-1.11827	down
31	MWS20151	C15H10O5	Apigenin; 4',5,7-Trihydroxyflavone	0.696694	-0.521402	down
32	Lmdn003756	C10H10O4	Methyl caffeate	0.626991	-0.673482	down
33	MWStz070	C9H11NO3	N-(2-Hydroxy-4-methoxyphenyl)acetamide	0.671385	-0.574788	down
34	Wahp006114	C34H37N3O6	Tri-p-coumaroyl Spermidine	0.404791	-1.30475	down
35	Lmjp009734	C15H20O2	Glechomanolide	4.01288	2.00464	up
36	HX1223	C15H24O	Germacra-1(10),4,7(11)-trien-9α-ol	1.41965	0.505533	up
37	Lssp210422	C15H10O5	Genistein	0.671272	-0.57503	down
38	Wafp002664	C15H20N2O4	1-O-p-Coumaroyllysine	0.697166	-0.520425	down
39	MWS20173	C15H24O2	1-Hydroxybisabola-2,10-dien-4-one	1.52779	0.611448	up
40	mws2105	C14H12O3	Benzyl salicylate	0.217835	-2.19869	down
41	Lmmn006306	C18H30O3	Machilusolide D	0.637578	-0.649326	down
42	pmb2893	C14H20N4O3	N-p-Coumaroylhydroxyagmatine	0.543317	-0.880134	down
43	Zjxp110324	C15H20O3	Isotelekin*	0.660828	-0.597652	down
44	pmp000191	C23H22O11	6''-O-Acetylgenistin	0.56877	-0.814082	down
45	Zmbp002538	C11H12N2O2	1-Methoxy-indole-3-acetamide	0.370564	-1.43221	down
46	Hmgp002327	C11H9O2N	3-amino-2-naphthoic acid	0.354137	-1.49762	down
47	pmb0501	C5H14N4	Agmatine	0.117398	-3.09052	down
48	Lmcp005571	C15H20O3	Istanbulin B	0.669215	-0.579457	down
49	mws0005	C10H12N2	Tryptamine	0.711934	-0.490184	down
50	Yamp010812	C15H24	a-muuroladiene	0.621672	-0.685774	down
51	Lmjn007447	C15H22O2	Arteannuin J	0.617739	-0.69493	down
52	Lmmp102003	C15H22O	1(10)E,4E-Germacrone	0.574412	-0.799842	down
53	Wagp002398	C23H32N2O11	Tryptophan N-Rutinoside	0.519485	-0.944847	down
54	Zjxp110323	C15H20O3	Telekin/Ivalin*	0.667438	-0.583294	down
55	mws1038	C11H22N2O4S	Pantetheine	0.626219	-0.675261	down
56	Lmyp004407	C30H26O13	Kaempferol-3-O-(2''-p-Coumaroyl)galactoside*	2.12378	1.08663	up
57	Lcwp000595	C15H20O4	9alpha-Hydroxy-11beta,13-Dihydrozaluzanin C	0.66045	-0.598479	down
58	Cmxp005429	C15H12O6	Okanin	0.582388	-0.779947	down
59	Hmcp004865	C15H20O2	Costunolide	1.64088	0.714467	up
60	Hmcn002875	C15H10O7	6-Hydroxyluteolin	1.45046	0.536513	up
61	pmp001248	C20H30NO9+	Caffeoylcholine-4-O-glucoside*	0.408265	-1.29242	down
62	MWSmce448	C5H6N2O2	Imidazol-1-yl-acetic acid	1.76376	0.818657	up
63	Lmsp009245	C18H18O7	3',5-Dihydroxy-4',6,7-Trimethoxyflavanone	0.707642	-0.498909	down
64	Zasp102439	C8H7N	m-Aminophenylacetylene	0.395784	-1.33722	down
65	pmb0818	C11H11NO3	Methoxyindoleacetic acid	0.369197	-1.43754	down
66	pme0066	C3H7N3O2	Guanidinoacetate	0.595777	-0.747157	down
67	pma2088	C27H30O17	Quercetin-3,4'-O-di-glucoside	2.12119	1.08487	up
68	MWSmce503	C15H22O3	Nardosinone	1.49856	0.583575	up
69	Zmwp006094	C15H20O3	Hyroxyisogermafurenolide	0.636719	-0.651272	down
70	MW0052877	C15H24O	2-trans,6-trans-Farnesal	1.41462	0.500418	up
71	MW0129900	C14H17NO	1-Cinnamoylpiperidine	0.663777	-0.59123	down
72	MW0137619	C25H24O11	Catechin pentaacetate	0.551696	-0.858055	down
73	Cmap003986	C35H40O8	Arteminolide C	1.46253	0.548463	up
74	Lmmp002080	C11H16N2O	N-(4-Aminobutyl)benzamide	0.704261	-0.505818	down
75	Hmgp002121	C31H28O13	Hispidulin-7-O-(6''-O-p-Coumaroyl)Glucoside	0.662666	-0.593646	down
76	Qmqp102534	C15H20O2	Isoalantolactone	1.48147	0.567029	up
77	Lmgp000659	C8H9NO	2-Phenylacetamide	0.672669	-0.572031	down
78	MW0113161	C14H18N2O5	Musk ketone	1.7759	0.828549	up
79	Lmmn003663	C14H18O9	5-Glucosyloxy-2-Hydroxybenzoic acid methyl ester	1.42819	0.514188	up
80	pmp000581	C23H22O11	Apigenin-7-O-(6''-acetyl)glucoside	0.616205	-0.698518	down
81	MW0131473	C17H14O8	5,7,3',4'-Tetrahydroxy-6,8-dimethoxyflavone	1.53057	0.614073	up
82	mws1509	C13H10O3	Phenyl salicylate	1.60248	0.680306	up
83	mws1013	C9H6O4	Esculetin (6,7-Dihydroxycoumarin)	0.483924	-1.04715	down
84	MW0132545	C15H10O5	3,7,4'-Trihydroxyflavone	0.662064	-0.594957	down
85	Ladp002935	C10H7NO3	3-quinolinecarboxylic acid	0.311133	-1.6844	down
86	HX1367	C9H6O2	coumarin(ISO2)	1.89633	0.923211	up
87	mws0791	C28H34O14	Poncirin (Isosakuranetin-7-O-neohesperidoside)*	3.44612	1.78497	up
88	Smrp005771	C20H20O4	Licarin B	0.638725	-0.646734	down
89	Hmcn002875	C15H10O7	6-Hydroxyluteolin	1.45046	0.536513	up
90	Zjxp110301	C18H30O3	3-Hydroxy-3,7,11-trimethyldodeca-1,6E,10-trien-9-yl isobutyrate	0.711709	-0.490642	down
91	Hmdn006855	C30H48O3	3,4-Cycloopen-cycloaltin-4(29),25-diene-24(R)-hydroxy-3-carboxylic acid	0.563212	-0.828249	down
92	Ymjm000152	C12H16O7	p-Hydroxypheny-β-D-allopyranoside	0.634358	-0.656632	down
93	mws0597	C10H9NO3	5-Hydroxyindole-3-acetic acid	0.708499	-0.497162	down
94	MWSmce062	C15H18O3	Xanthatin	0.519729	-0.944168	down
95	HJKP000649	C8H9NO	N-benzylformamide	0.654548	-0.611429	down
96	pme2292	C4H12N2	Putrescine	0.644499	-0.633749	down
97	Jmgn005927	C15H12O6	2-hydroxynaringenin	1.41171	0.497443	up
98	Zmtn001624	C10H7NO3	N-Acetylisatin	0.289285	-1.78944	down
99	mws1172	C22H22O10	Trifolirhizin (Maackiain-3-O-glucoside)	1.67241	0.741924	up
100	MWSmce502	C15H22O2	Artemisinic acid	1.67491	0.744081	up
101	Jmcp010061	C15H22O2	costic acid	1.67491	0.744081	up
102	Wbmp002283	C9H7NO	Α-hydroxyquinoline	0.371258	-1.42951	down
103	pmp000912	C15H18O3	Hydroxyindesteolide	0.462951	-1.11107	down
104	Lmsp004137	C15H12O6	3,4,2',4',6'-Pentahydroxychalcone	1.4887	0.574051	up
105	pmp000479	C16H29NO	N-Isobutyl-2E,4E-dodedienamide	0.614776	-0.701867	down
106	mws0051	C16H12O5	Acacetin	0.298436	-1.7445	down
107	Lmsp102219	C15H10O5	Aloe emodin	0.612691	-0.706768	down
108	Wasn003938	C13H16O7	Benzoyl-Beta-D-Glucoside	2.2168	1.14848	up
109	Hmmp001310	C11H9NO2	3-Indoleacrylic acid	0.355727	-1.49116	down
110	Cmyp003257	C19H30O8	Icariside B1	0.699558	-0.515484	down
111	Lmsn002247	C13H16O8	1-O-Salicyloyl-β-D-glucose	0.556768	-0.844853	down
112	Zjyp110102	C15H22O	Nootkatone(iso-1)	1.4814	0.566964	up
113	Cmap003293	C15H16O3	Yomogin	0.451893	-1.14595	down
114	Lmcp006876	C17H14O2	8-(Benzyloxy)-1-Naphthol	1.40791	0.493557	up
115	Lmcp006752	C18H16O3	2-[2-(4-Methoxyphenyl)ethyl]chromone	0.627239	-0.672914	down
116	HJN003	C17H22O10	1-O-Sinapoyl-β-D-glucose	0.569261	-0.812838	down
117	zjzp121502	C15H20O3	eupatorinol(iso-1)	2.03712	1.02653	up
118	mws1417	C9H7NO2	Indole-3-carboxylic acid*	0.604162	-0.726992	down
119	MWSmce338	C6H11NO3	N-Hydroxypipecolic acid	1.59313	0.671868	up
120	Layp004060	C18H18O12	5,7-Dihydroxychromone malonyl glucoside	2.07968	1.05636	up
121	Lmdn006025	C15H12O6	2-Hydroxy-2,3-dihydrogenistein	1.42394	0.509884	up
122	Wmqn000820	C11H14O3	Dehydrololiolide	0.623743	-0.680977	down
123	Lmfn004093	C21H24O10	Phloretin-4'-O-glucoside (Trilobatin)	0.595771	-0.74717	down
124	pmb1096	C8H7N	Indole	0.425275	-1.23353	down
125	Xmbp001692	C7H6O5	2,4,6-Trihydroxybenzoic acid	0.576844	-0.793747	down
126	Lmyn012274	C30H46O4	3,25-Epoxy-3-hydroxyolean-18-en-28-oic acid (Semimoronic acid)	1.77766	0.829981	up
127	Lmyn011818	C30H44O4	3,19-Epoxy-3,22-dihydroxydammara-20,24-dien-26-oic acid δ-lactone (Semialactone)	1.9943	0.995881	up
128	mws1290	C30H26O13	Kaempferol-3-O-(6''-p-Coumaroyl)glucoside (Tiliroside)	3.35064	1.74444	up
129	Qmqp102523	C15H20O3	Pechueloic acid	0.698384	-0.517908	down
130	Layp001601	C17H23NO11	Malonyl hydroxymenisdaurin D	0.597305	-0.74346	down
131	Lmcp000282	C7H15NO3	L-Carnitine	0.694793	-0.525345	down
132	Zahp009671	C14H29NO	N-isopropylundecanamide	0.567383	-0.817606	down
133	HJN055	C21H24O10	Dihydrocharcone-4'-O-glucoside	0.209214	-2.25695	down
134	pmb0774	C10H12N2O	N-Hydroxytryptamine	0.489265	-1.03131	down
135	MWSmce675	C12H16O7	Arbutin	0.64175	-0.639917	down
136	MW0124084	C13H14O3	Eupatoriochromene	0.48404	-1.0468	down
137	pmp000086	C13H16O6	1-Feruloyl-sn-glycerol*	3.19897	1.67761	up
138	Zmsn003589	C21H32O9	Lactuside B	1.55079	0.633005	up
139	pmb3142	C13H16O8	Salicylic acid-2-O-glucoside	0.55864	-0.84001	down
140	Qmjp081206	C15H20O2	Isogermafurenolide	0.711934	-0.490184	down
141	Smcp001137	C11H9NO2	naphthisoxazol A	0.364925	-1.45433	down
142	Lmsp011263	C18H16O6	6-Hydroxy-5,7,4'-trimethoxyflavone	0.655124	-0.610161	down
143	Zbxp006600	C27H30O14	Acacetin-O-galactoside-xyloside	0.665261	-0.588008	down
144	MWS0434	C19H28O2	Trans-dehydrorosinone	0.709981	-0.494147	down
145	MWSmce084	C14H16O3	Fraxinellone	0.655994	-0.608245	down
146	pme2836	C10H11NO2	5-Hydroxytryptophol	0.672613	-0.572151	down
147	Lmjp005016	C17H14O7	Cirsiliol (3',4',5-Trihydroxy-6,7-Dimethoxyflavone)	0.693882	-0.527239	down
148	mws0179	C17H20O9	Chlorogenic acid methyl ester	4.34683	2.11997	up
149	mws0918	C16H12O5	Prunetin (5,4'-Dihydroxy-7-methoxyisoflavone)	0.293677	-1.7677	down
150	Zjxp110328	C15H18O3	Inunal	0.711353	-0.491363	down
151	Hmlp000935	C8H11NO2	Vanillylamine	0.603918	-0.727575	down
152	Jmcn005419	C21H36O7	pterodontoside G	1.6899	0.756937	up
153	Zbxp008542	C31H34O18	Acacetin-7-O-(6''-O-malonyl)sophorobiglycoside	0.0894829	-3.48224	down
154	Lmln001195	C14H18O7	Picein (4-Acetylphenyl-glucoside)	0.372517	-1.42462	down
155	Wcjp002397	C23H27NO8	Dubiusine	0.618529	-0.693088	down
156	pmp000249	C12H14O3	Senkyunolide F	1.40665	0.492263	up
157	Lmhn001477	C13H12O9	2-Caffeoyl-L-tartaric acid (Caftaric acid)	0.700699	-0.513133	down
158	MW0004587	C11H14O3	4-Allyl-2,6-dimethoxyphenol	0.615253	-0.700748	down
159	MWSmce466	C8H8O2	4-Hydroxyacetophenone	0.628252	-0.670586	down
160	Lmmp003042	C8H8O4	Protocatechuic Acid Methyl Ester	1.44801	0.53407	up
161	pmp000436	C30H50O	13-Methyl-27-norolean-14-en-3-ol (Taraxerol)	2.80455	1.48777	up
162	Zmhn000892	C13H18O8	4-O-Glucosyl-3,4-dihydroxybenzyl alcohol	0.52808	-0.921171	down
163	Lhhp102906	C15H20O3	Parthenolide	0.656472	-0.607195	down
164	pmp001287	C8H9N	N-Benzylmethylene isomethylamine	0.391653	-1.35235	down
165	mws1179	C21H22O10	Naringenin-7-O-glucoside (Prunin)*	1.40639	0.491992	up
166	mws0704	C2H8NO4P	O-Phosphorylethanolamine	0.582591	-0.779445	down
167	MWSmce709	C9H7N	Isoquinoline	0.455448	-1.13464	down
168	Zmjp008503	C18H16O6	5-Hydroxy-4',6,7-trimethoxyflavone (Salvigenin)	0.71003	-0.494047	down
169	pme2244	C11H11NO2	3-Indolepropionic acid	0.346702	-1.52823	down
170	Hmln000659	C13H16O10	3-O-Galloyl-D-glucose*	1.55213	0.634253	up
171	Smgp006258	C30H26O13	6,7,3',4'-Tetrahydroxyaurone-6-O-(6''-O-p-Coumaroyl)glucoside	1.71621	0.779225	up
172	Hmlp005624	C16H12O5	3',7-dihydroxy-4'-methoxyflavone	0.595169	-0.748629	down
173	Lmzn106829	C30H46O3	3-Oxolup-20(29)-en-28-oic acid (Betulonic acid)	1.57064	0.651351	up
174	Latp006450	C15H18O2	Spirovirgafuran	1.70332	0.768349	up
175	Qmqp101711	C11H12O3	Trans-p-hydroxycinnamic acid ethyl ester	0.662707	-0.593557	down
176	MWSslk155	C9H10O5	4-Hydroxy-3-methoxymandelate	0.634381	-0.656578	down
177	pmb3074	C16H18O8	5-O-p-Coumaroylquinic acid*	1.63248	0.707067	up
178	Lmmn001643	C9H8O3	2-Hydroxycinnamic acid*	0.706364	-0.501517	down
179	MWSHC2026	C12H12N2O2	Lycoperodine-1	0.631522	-0.663096	down
180	Zmhn002227	C17H22O10	4-O-Glucosyl-sinapate	0.568376	-0.815083	down
181	Lmyp004318	C30H26O13	Kaempferol-3-O-(6''-p-Coumaroyl)galactoside*	1.73484	0.794799	up
182	Lmfp005436	C27H22O15	Quercetin-3-O-(2''-O-galloyl)Arabinoside	4.28825	2.10039	up
183	Zmhn002269	C11H10O6S	2,5-Dimethylchromone-7-O-sulfate	0.0476038	-4.39278	down
184	Latp006670	C15H20O3	Telekin	2.40707	1.26728	up
185	pme2693	C6H14N2O	N-Acetylputrescine	0.178258	-2.48797	down
186	mws2212	C9H8O4	Caffeic acid	0.32929	-1.60257	down
187	pmp000413	C21H20O10	Genistein-8-C-glucoside	0.666313	-0.585729	down
188	Hmyp002656	C11H11NO4	Methyl dioxindole-3-acetate	0.532756	-0.908452	down
189	MWS1743	C15H20O	alpha-hexylcinnamaldehyde	1.66078	0.731858	up
190	Lmbn005172	C9H10O3	2,6-Dimethoxybenzaldehyde	0.474169	-1.07653	down
191	Hmsn002272	C15H20O8	Demethyl coniferin	0.223101	-2.16423	down
192	MW0168254	C22H30O4	Cafestol acetate	0.552067	-0.857084	down
193	Jmgn004021	C21H22O11	6-C-Glucosyl-2-Hydroxynaringenin	0.495909	-1.01185	down
194	Hmsn001911	C13H18O8	Idesin	0.562862	-0.829147	down
195	mws0943	C7H8N2O2	1,4-Dihydro-1-Methyl-4-oxo-3-pyridinecarboxamide	1.91612	0.938189	up
196	Hmlp003068	C27H30O17	Meratin	1.59349	0.672194	up
197	Lmqn004838	C15H8O8	3-O-Methylellagic acid	0.647604	-0.626817	down
198	Lman002117	C15H18O9	Grevilloside Q	0.516222	-0.953937	down
199	pmn001421	C16H18O8	3-O-p-Coumaroylquinic acid*	2.73602	1.45208	up
200	MWS2091	C8H10O	1-Phenylethanol	0.660187	-0.599053	down
201	Lmcp007199	C11H10	2-Methylnaphthalene	0.624199	-0.679922	down
202	Zmsn004957	C27H42O12	Ixerisoside N	0.460938	-1.11736	down
203	Wbsp000203	C31H52O5	3-O-acetyltohogenol	1.96916	0.977579	up
204	MW0136833	C15H10O4	7,3'-Dihydroxyflavone	1.41235	0.498099	up
205	Zbjn003642	C22H28O13	1-O-rhamnose-3-O-Caffeoyl Quinic Acid	1.62342	0.699036	up
206	Wcjp002598	C9H7NO	8-hydroxyquinoline	0.379256	-1.39876	down
207	Wchn003984	C16H18O8	Alpha-Hydrojuglone 4-Glucoside	2.60715	1.38248	up
208	Smmp010394	C17H22O4	Epitulipinolide	0.543545	-0.879529	down
209	pmb0069	C7H7NO	Benzamide	0.497536	-1.00713	down
210	HJAP165	C18H33NO	N-Isobutyl-2,4-tetradecanedienamide	0.66267	-0.593638	down
211	Yalp106267	C40H52O17	Swietenialide A	0.62223	-0.68448	down
212	Zbjn005476	C34H30O15	1,3,4-Tri-O-Caffeoyl Quinic Acid	0.536091	-0.89945	down
213	Lmhn004030	C15H14O6	5,7,3',4',5'-Pentahydroxyflavan (Tricetiflavan)	0.682123	-0.551897	down
214	Lmgn002933	C18H18O7	5,7-Dihydroxy-2',3',4'-trimethoxydihydroisoflavone	1.5112	0.595696	up
215	Cmhp005227	C16H18O8	4,8-Dihydroxy Naphthol-1-O-glucoside	2.39794	1.2618	up
216	Smcp000882	C15H21NO7	N-benzoyl-2-aminoethyl-β-D-glucopyranoside	0.589386	-0.762715	down
217	Jmzn006005	C10H10O3	3,4-Methylenedioxy cinnamyl alcohol	2.12389	1.08671	up
218	Hmmp003875	C8H5NO2	Isatin	0.67244	-0.572523	down
219	Qmyp122014	C15H20O3	Pterodnic acid(ISO1)	1.5515	0.633667	up
220	MA10107783	C10H8O5	3-[(1-Carboxyvinyl)oxy]benzoic acid	0.52897	-0.918742	down
221	MWSmce041	C12H14O2	Butylphthalide	1.61522	0.691728	up
222	mws0178	C16H18O9	Chlorogenic acid (3-O-Caffeoylquinic acid)*	2.55334	1.35219	up
223	MWSmce446	C22H28O11	Cimifugin-7-O-glucoside	0.546189	-0.872528	down
224	Zbln001290	C14H20O9	β-Hydroxy-(3,4-dihydroxyphenylethanolyl)-glucoside	1.40115	0.486611	up
225	pmb3062	C17H22O10	1-O-Eudesmoylquinic acid	0.677964	-0.56072	down
226	Cmbn004440	C25H28O13	10-O-[(E)-Caffeoyl]-geniposidic acid	1.43598	0.522033	up
227	Qmyp101440	C13H22O2	Blumenol C(ISO3)	0.632243	-0.661448	down
228	mws0677	C12H14N2O2	N-Acetyl-5-hydroxytryptamine	0.676466	-0.56391	down
229	pmb0772	C19H18N2O2	N-Cinnamoylserotonin	0.351721	-1.5075	down
230	Hmdn006566	C30H48O3	3,4-Open loop-lupine-4(23),20(29)-diene-24-hydroxy-3-carboxylic acid	0.70564	-0.502996	down
231	pmb2654	C19H27NO12	Anthranilate-1-O-Sophoroside	1.98822	0.991478	up
232	Cmsp003083	C26H32O11	Dehydrodiconiferyl alcohol-4-O-glucoside*	1.53009	0.61362	up
233	pme0241	C7H6O2	Benzoic acid	2.02033	1.01459	up
234	Lmjp009373	C15H16O	Pyrocurzerenone	0.568313	-0.815242	down
235	Zmhn001257	C21H24O11	Catechin-5-O-glucoside	0.208065	-2.26489	down
236	MW0002106	C13H10O5	2,3',4,6-Tetrahydroxybenzophenone	0.509543	-0.972725	down
237	mws0027	C9H10O5	Syringic acid	1.49774	0.582792	up
238	Qmdp112404	C22H36O3	Viteagnusin B	0.464571	-1.10603	down
239	pma0702	C29H39N3O8	N1,N8-Bis(sinapoyl)spermidine	1.57331	0.653806	up
240	Zbyp002402	C13H18O7	methylarbutin	0.540667	-0.887189	down
241	Zmdn004764	C24H30O11	Syringopicroside	0.623239	-0.682143	down
242	pmn001419	C15H18O8	1-O-p-Coumaroyl-β-D-glucose	0.709091	-0.495958	down
243	Zmsn002206	C16H24O10	Cornusoside A	2.1304	1.09113	up
244	Lsmp010410	C27H28O12	Ethyl 1,4-di-O-caffeoylquinate	0.343467	-1.54176	down
245	Labn007765	C34H40O14	Leachianone F malonyl glucoside	0.605407	-0.724023	down
246	MWSslk252	C28H34O14	Didymin (Isosakuranetin-7-O-rutinoside)*	3.43709	1.78119	up
247	Lmhp003162	C34H42O21	Chrysoeriol-6,8-di-C-glucoside-4'-O-glucoside*	0.689432	-0.53652	down
248	pmb0618	C28H34O16	Hesperetin-8-C-glucoside-3'-O-glucoside	1.64111	0.714668	up
249	Lkmp122408	C22H32O10	Malonyl byzantionoside A	0.643693	-0.635555	down
250	zjgp122310	C13H8O	Trideca-2,12-diene-4,6,8,10-tetrayne-1-diol	0.571037	-0.808343	down
251	Zmxn110201	C14H20O9	2,6-Dimethoxy-4-hydroxyphenol-1-O-ß-D-glucopyranoside	0.59998	-0.737014	down
252	pmp000087	C13H16O6	2-Feruloyl-sn-glycerol*	2.24144	1.16443	up
253	pma6460	C16H18O8	4-O-p-Coumaroylquinic acid	2.74593	1.45729	up
254	Lacp005577	C22H32O10	3-(3'-Hydroxybutyl)-2,4,4-trimethylcyclohexa-2,5-dienone malonyl glucoside	0.694931	-0.525058	down
255	pmb2833	C23H30O14	3-O-Feruloylquinic acid-O-glucoside	1.47627	0.561956	up
256	Rfmb26201	C30H38O14	Syringaresinol-4'-O-(6''-acetyl)glucoside	0.517733	-0.949719	down
257	Lmhn003240	C11H10O6	Benzoylmalic acid	1.69678	0.762798	up
258	Labp005273	C27H30O14	Acacetin glucosyl xyloside	0.696222	-0.522381	down
259	Zmbp102503	C17H16O9	Bergaptol-O-β-D-glucoside	1.58156	0.661344	up
260	Smcn000644	C14H20O9	Leonuriside A	0.593804	-0.751941	down
261	Li512111	C24H24O13	Isorhamnetin-3-O-(6''-acetylglucoside)	0.6941	-0.526785	down
262	Zmcn005156	C26H26O12	4,5-O-Dicaffeoylquinic Acid Methyl Ester	2.9205	1.54622	up
263	Hmcp003285	C15H20O3	Santamarin	1.66162	0.732588	up
264	Lmap001823	C14H17NO7	Dhurrin	1.92714	0.946461	up
265	Zmtp009051	C14H16O2	Liguhodgsonal	2.02115	1.01518	up
266	pmb0819	C10H8N2	3-Indoleacetonitrile	0.450062	-1.1518	down
267	HJAP135	C24H24O12	Pinocembrin-7-O-(6''-O-malonyl)glucoside	1.71622	0.779233	up
268	Hmhn002787	C21H32O10	(1'R,3R,5R,8'S)-Dihydrophaseic acid-O-β-D-glucoside	0.584111	-0.775684	down
269	pmp001244	C14H20NO4+	Caffeoylcholine	0.453704	-1.14018	down
270	HJAP044	C12H16O4	1-(2,4,5-Trimethoxyphenyl)propan-1-one	2.23935	1.16308	up
271	Smsp110188	C15H22O2	isopolygodial	1.80127	0.849014	up
272	mws0467	C9H10O3	3-(4-Hydroxyphenyl)-propionic acid	0.334137	-1.58149	down
273	pmp000906	C15H16O	Dihydroylindesteolene	0.5281	-0.921117	down
274	HX1360	C10H8O3	7-methoxycoumarin	3.68384	1.88121	up
275	Lmmn004912	C16H12O7	3-O-Methylquercetin	2.37472	1.24776	up
276	Lmmp002995	C30H32O20	Quercetin-7-O-(2''-malonyl)glucosyl-5-O-glucoside	0.653592	-0.613537	down
277	Jmwp003339	C14H20O6	2-Phenylethy-1-O-β-D-glucoside	0.621829	-0.685411	down
278	pmn001644	C23H20O14	Quercetin-3-O-(2''-O-acetyl)glucuronide	0.697698	-0.519326	down
279	Lmyp002204	C21H22O11	Hovertichoside C	0.679186	-0.558122	down
280	Hmbp002498	C21H26O13	Scopoletin-7-O-xylosyl(1→6)glucoside	0.537892	-0.894612	down
281	Qmqp102522	C17H22O6	Argyinolide G	0.540229	-0.888356	down
282	mws0983	C20H39NO2	N-Oleoylethanolamine	0.669512	-0.578817	down
283	Zahp010142	C14H25NO	isopellitorine	0.528869	-0.919019	down
284	mws1714	C22H18O12	Chicoric Acid	0.603691	-0.728118	down
285	mws0885	C7H6O4	2,4-Dihydroxybenzoic acid	0.482098	-1.0526	down
286	pme2987	C9H8O2	3,4-Dihydrocoumarin	1.61917	0.695254	up
287	Hmmp002121	C23H16O11	Isorhamnetin-3-O-gallate	0.695257	-0.524383	down
288	HJN104	C21H22O13	Dihydromyricetin-3-O-glucoside	0.511197	-0.968048	down
289	Wbmn00859	C20H16O8	vitelignin A	2.65573	1.40911	up
290	Lmjp003822	C26H26O12	3,5-O-Dicaffeoylquinic Acid Methyl Ester*	1.54339	0.626099	up
291	HJN106	C30H46O5	2-Carboxy-3-hydroxy-A(1)-norlupan-20(29)-en-28-oic acid (Ceanothic acid)	2.20329	1.13966	up
292	MWSmce571	C8H11N	N-Methylbenzylamine	0.512077	-0.965567	down
293	Wasn003817	C16H26O9	Glucosyl 5,8-dihydroxy-2,6-dimethylocta-2,6-dienoic acid	0.695866	-0.523119	down
294	NK10246260	C9H7NO2	2,4-Dihydroxyquinoline	0.452946	-1.14259	down
295	pmb0620	C34H42O21	Chrysoeriol-6,8-di-C-glucoside-7-O-glucoside*	0.553287	-0.853901	down
296	Lmpn007255	C16H12O8	Patuletin (Quercetagetin-6-methyl ether)	1.78103	0.832716	up
297	Zmdn004104	C12H10O5	2-methyl-5-carboxy methyl-7-Hydroxy-chromone	0.0407729	-4.61624	down
298	Zmhn000593	C35H46O20	Magnoloside B	0.704496	-0.505337	down
299	pmp000005	C20H22O5	Moxartenolide	1.58849	0.66766	up
300	Wasn006584	C20H20O11	1-Galloyl-6-O-Benzoyl Glucose	1.4937	0.578887	up
301	pmp000394	C26H30O13	Naringenin-7-O-(2''-O-apiosyl)glucoside	0.247078	-2.01696	down
302	Lacp005602	C22H34O10	Blumenol C malonyl Glucoside	0.332331	-1.58931	down
303	Hmdn001667	C20H16O13	Ellagic acid-4-O-glucoside	1.76491	0.819591	up
304	Lajp006434	C24H26O12	3',5'-dihydroxy-5,7,4'-trimethoxyflavone glucoside	2.19888e-06	-18.7948	down
305	pmb2723	C21H26O13	4-Hydroxycoumarin di-glucoside	0.468338	-1.09438	down
306	Lafp003256	C11H14O5	3,4'-Dihydroxy-3',5'-dimethoxypropiophenone	0.658752	-0.602193	down
307	pmb0382	C19H14O6	O-Feruloyl 4-hydroxycoumarin	0.598498	-0.740581	down
308	Ladp002110	C10H7NO4	4-hydroxy-2-oxo-1,2-dihydroquinoline-3-carboxylic acid	0.691891	-0.531383	down
309	MWS1852	C8H8O2	4-Methoxybenzaldehyde	1.53446	0.617728	up
310	Lmbp003208	C17H20O10	Fraxidin-8-O-glucoside	0.668348	-0.58133	down
311	Lsmp010419	C13H20O3	Corchoionol C	4.90603	2.29456	up
312	Lakn002786	C17H22O12	Protocatechuic acid xylosyl xyloside	0.594556	-0.750116	down
313	Lmyn005006	C30H28O13	Eriodictyol-7-O-(6''-O-p-coumaroyl)glucoside	3.72385	1.8968	up
314	mws1526	C16H22O9	Sweroside	0.624941	-0.678208	down
315	pmp000663	C21H30O3	Tussilagonone	0.605318	-0.724236	down
316	Lcyp000677	C22H22O10	Prunitrin	0.664582	-0.58948	down
317	Lmdp003146	C10H14O2	Rhododendrol	0.650342	-0.62073	down
318	Wbjp003906	C13H12N2O2	7-methoxy-1-methyl-9H-pyrido[3,4-b]indol-6-ol	0.529708	-0.916731	down
319	Lkmp122714	C19H30O8	Sonchuionoside A	0.573985	-0.800916	down
320	FDATN00282	C28H36O15	Neohesperidin dihydrochalcone	0.668781	-0.580395	down
321	Zalp003488	C17H20O9	4-O-Caffeoylquinic acid methyl ester	2.78229	1.47627	up
322	mws1074	C9H6O4	Daphnetin	0.64984	-0.621843	down
323	Lmtp003569	C8H9NO2	(R)-Mandelamide	0.414242	-1.27145	down
324	Wmzn006169	C30H48O4	3,16-Dihydroxyolean-12-en-28-oic acid (Echinocystic acid)	1.51885	0.602975	up
325	Wafp002310	C15H20N2O5	1-O-Caffeoyllysine	0.433899	-1.20457	down
326	Hmcn000773	C21H32O14	6'-O-Glucosylaucubin	0.607657	-0.71867	down
327	Zmbp000555	C10H10N2O	3-Indole acetamide	1.55559	0.637464	up
328	mws1584	C25H24O12	1,3-O-Dicaffeoylquinic Acid (Cynarin)	0.450883	-1.14918	down
329	Cmap003902	C35H40O8	Arteminolide D	1.71806	0.780776	up
330	Lmhn003246	C24H22O13	Sinapoylcaffeoyltartaric acid	0.685632	-0.544494	down
331	Wmzn002116	C25H24O12	3,5-Dicaffeoylquinic acid	0.549302	-0.864328	down
332	Lmsn000363	C16H22O7	Raspberryketone glucoside	0.553646	-0.852963	down
333	Lsmp010416	C25H26O11	everlastoside L	0.521464	-0.93936	down
334	Lmnp003080	C26H28O14	Hispidulin-8-C-(2''-O-xylosyl)xyloside	0.546878	-0.87071	down
335	Zmcp002666	C27H30O17	Quercetin-3,7-Di-O-glucoside	1.47618	0.561868	up
336	Qmqp101743	C36H42O11	Sarcandrolide B	2.21525	1.14747	up
337	pma0692	C25H31N3O4	N1,N10-Bis(p-coumaroyl)spermidine	1.44669	0.532758	up
338	Lacp003788	C17H20O9	Amurenlaetone A	2.96406	1.56758	up
339	Lcmp123017	C10H14O2	Dihydrohinokitiol	0.565497	-0.822409	down
340	pmp000014	C35H40O8	Arteminolide B	1.51872	0.602859	up
341	pmn001637	C20H18O10	Kaempferol-3-O-arabinoside (Juglanin)	1.43879	0.524851	up
342	Zmsn002575	C17H24O11	Hastatoside	0.420479	-1.24989	down
343	mad2085	C22H18O11	Caffeoyl-p-coumaroyltartaric acid	0.683478	-0.549033	down
344	Lhfp110335	C20H28O4	6-Angeloylfuranofukinol(iso-05)	0.397192	-1.33209	down
345	Lmsp003655	C26H32O11	Dehydrodiconiferyl alcohol-gamma'-O-glucoside*	1.41652	0.502354	up
346	mws1077	C16H18O9	Scopoletin-7-O-glucoside (Scopolin)	0.692862	-0.529359	down
347	pmn001498	C33H44N2O3	Isodendrocrepine*	0.610777	-0.711282	down
348	pmb0603	C28H32O16	Chrysoeriol-7,4'-di-O-glucoside	0.520775	-0.941268	down
349	pmp001311	C27H30O17	6-Hydroxykaempferol-7,6-O-Diglucoside	1.52241	0.606358	up
350	pmp000592	C27H30O15	Apigenin-7,4'-di-O-Glucoside	0.105254	-3.24806	down
351	Lmhn001580	C15H16O10	Sinapoyltartaric acid	1.46683	0.552702	up
352	Lsmp121707	C24H40O11	Cuneataside E	0.501027	-0.997039	down
353	Lhhp120823	C11H12O3	Eugenyl formate	0.673069	-0.571174	down
354	Hmmp002240	C40H50O27	Isorhamnetin-3-O-rutinoside-7-O-(2''-O-glucosyl)glucuronate	1.54249	0.625258	up
355	MWSslk149	C8H8O4	5-Methoxysalicylic acid	0.61785	-0.694671	down
356	Zbbp005287	C24H40O11	Platanionoside E	0.516652	-0.952734	down
357	Wagp004424	C19H21NO10	Acetoxyindole N-malonyl glucoside	3941.25	11.9444	up
358	Lakp003279	C30H32O21	Malonyl glucosyl myricetin glucoside	0.706606	-0.501022	down
359	pmb0752	C17H20O9	3-O-Feruloylquinic acid	3.22429	1.68898	up
360	pma3724	C17H20O9	1-O-Feruloylquinic acid	6.21916	2.63672	up
361	Latp005079	C15H22O4	Ivaxillin	2.46231	1.30001	up
362	Lhmp121005	C26H32O11	Symplocosin(iso-01)	1.46637	0.552251	up
363	Zbdn001947	C13H18O8	Isotachioside*	3.07632	1.6212	up
364	MWSmce661	C15H18O2	Atractylenolide I	0.547569	-0.868887	down
365	HJAP051	C12H18O4	3-(3,4,5-Trimethoxyphenyl)propan-1-ol	1.64351	0.716781	up
366	mws0748	C16H18O9	1-Caffeoylquinic acid	0.346335	-1.52976	down
367	Lmyp004963	C27H30O14	Apigenin-6-C-(2''-rhamnosyl)glucoside	0.424161	-1.23732	down
368	Lmzn001983	C16H24O10	D-Threo-guaiacylglycerol-7-O-β-D-glucoside	0.705245	-0.503803	down
369	Qmxp101501	C13H20O4	13-Carboxy-blumenol C	3.29699	1.72115	up
370	Zjxp110326	C17H22O5	Oxobritannilactone	0.605357	-0.724141	down
371	MWS20178	C11H10O5	isofraxidin	0.459888	-1.12065	down
372	Zbjn002472	C37H44O21	Caffeoylquinic acid-glucose-rhamnose-caffeoyl	0.424641	-1.23568	down
373	Hmqp006656	C21H34O3	12-Hydroxyhydromethylabietate	0.698545	-0.517575	down
374	pmp000602	C19H22O9	6-Hydroxymusizin-8-O-β-D-glucoside	0.061521	-4.02278	down
375	Lmsn004674	C15H18O7	1-O-Cinnamoyl-β-D-glucose	0.49998	-1.00006	down
376	Zahp013600	C18H35NO	octadec-2-enamide	0.603212	-0.729264	down
377	Hmcn004128	C16H20O8	P-Methoyxcinnamate glucoside	0.437633	-1.19221	down
378	Lmtn002233	C15H20O8	Androsin	0.299909	-1.7374	down
379	pmb0666	C38H40O19	Isovitexin-7-O-(6''-sinapoyl)glucoside	1.65924	0.73052	up
380	Wasn002449	C19H26O13	Protocatechuic acid 1-O-Rutinoside	0.688754	-0.537938	down
381	Lmmp006709	C30H26O12	Kaempferol-3-O-(4''-p-coumaroyl)rhamnoside	2.5512	1.35117	up
382	Zmtp007670	C15H16O2	1-Oxo-9-desoxycacalol	0.531301	-0.912399	down
383	Zbzp003763	C10H8O3	11-methoxy viburtinal	3.22399	1.68885	up
384	pmb3002	C28H32O15	Chrysoeriol-7-O-rutinoside	700.654	9.45256	up
385	Wmmn000117	C18H24O14	mudanoside B	0.707112	-0.499989	down
386	Lajp003585	C17H20O9	Murrayacarpin A glucoside	7.24185	2.85636	up
387	Hmcp001629	C30H32O19	Kaempferol-3-O-(6''-Malonyl)glucoside-7-O-Glucoside	0.699614	-0.515369	down
388	Lsjp211201	C13H20O2	3S-3-hydroxy-β-damascon	0.526836	-0.924574	down
389	Cmjp004550	C17H26O10	Loganin	4.65504	2.21879	up
390	pmb0500	C23H26N2O5	N-p-Coumaroyl-N'-feruloylputrescine	0.613105	-0.705794	down
391	Walp003622	C15H17NO8	6-beta-d-glucopyranosyloxyindole-3-carboxylic acid	0.000109218	-13.1605	down
392	Latp003285	C17H20O8	2,5-Dimethyl-7-hydroxychromone glucoside	0.100193	-3.31915	down
393	pmb0716	C29H34O17	Tricin-4'-O-glucoside-7-O-glucoside	0.659844	-0.599803	down
394	Hmcn002875	C15H10O7	6-Hydroxyluteolin	1.45046	0.536513	up
